1           **Alpha-synuclein-induced mitochondrial dysfunction is mediated via a sirtuin 3-**  
2                                                                   **dependent pathway**

3  
4           Jae-Hyeon Park<sup>1</sup>, Marion Delenclos<sup>1</sup>, Ayman H. Faroqi<sup>1</sup>, Natasha N. DeMeo<sup>1</sup>,  
5                                                                   and Pamela J. McLean<sup>1,2\*</sup>

6  
7  
8  
9           <sup>1</sup>Department of Neuroscience, Mayo Clinic, Jacksonville, FL, USA

10          <sup>2</sup>Mayo Clinic Graduate School of Biomedical Sciences, Mayo Clinic College of Medicine,  
11          Jacksonville, FL, USA

12  
13          Running title: SIRT3 downregulation by alpha-synuclein

14  
15  
16          \* Corresponding author: Department of Neuroscience, Mayo Clinic, 4500 San Pablo Road,  
17          Jacksonville, FL 32224, USA. Tel.: +1 904 953 6692; Fax: +1 904 953 7117.

18          E-mail: [mclean.pamela@mayo.edu](mailto:mclean.pamela@mayo.edu) (P.J. McLean).

19

20 **Abstract**

21 The sirtuins are highly conserved nicotinamide adenine dinucleotide (NAD<sup>+</sup>)-dependent en-  
22 zymes that play a broad role in cellular metabolism and aging. Mitochondrial sirtuin 3  
23 (SIRT3) is downregulated in aging and age-associated diseases such as cancer and neuro-  
24 degeneration and plays a major role in maintaining mitochondrial function and preventing  
25 oxidative stress. Mitochondria dysfunction is central to the pathogenesis of Parkinson disease  
26 with mutations in mitochondrial-associated proteins such as PINK1 and parkin causing famil-  
27 ial Parkinson disease. Here, we demonstrate that the presence of alpha-synuclein ( $\alpha$ syn) oli-  
28 gomers in mitochondria induce a corresponding decrease in mitochondrial SIRT3 activity and  
29 decreased mitochondrial biogenesis. We show that SIRT3 downregulation in the presence of  
30  $\alpha$ syn accumulation is accompanied by increased phosphorylation of AMP-activated protein  
31 kinase (AMPK) and cAMP-response element binding protein (CREB), as well as increased  
32 phosphorylation of dynamin-related protein 1 (DRP1) and decreased levels of optic atrophy 1  
33 (OPA1), which is indicative of impaired mitochondrial dynamics. Treatment with the AMPK  
34 agonist 5-aminoimidazole-4-carboxamide-1- $\beta$ -d-ribofuranoside (AICAR) restores SIRT3 ex-  
35 pression and activity and improves mitochondrial function by decreasing  $\alpha$ syn oligomer for-  
36 mation. The accumulation of  $\alpha$ syn oligomers in mitochondria corresponds with SIRT3 down-  
37 regulation not only in an experimental cellular model, but also *in vivo* in a rodent model of  
38 Parkinson disease, and importantly, in human post mortem brains with neuropathologically  
39 confirmed Lewy body disease (LBD). Taken together our findings suggest that pharmacologi-  
40 cally increasing SIRT3 levels will counteract  $\alpha$ syn-induced mitochondrial dysfunction by  
41 normalizing mitochondrial bioenergetics. These data support a protective role for SIRT3 in  
42 Parkinson disease-associated pathways and reveals significant mechanistic insight into the  
43 interplay of SIRT3 and  $\alpha$ syn.

44

45 **Keywords:**  $\alpha$ -Synuclein; Sirtuin 3; Mitochondria dysfunction; Parkinson's disease

46

47 **Abbreviations:** SIRT3, Sirtuin 3;  $\alpha$ -synuclein;  $\alpha$ syn; AMPK, adenosine monophosphate acti-  
48 vated protein kinase; CREB, cAMP-response element binding protein; DRP1, dynamin-  
49 related protein 1; OPA1, optic atrophy 1; HO-1, heme oxygenase-1; SOD2, superoxide dis-  
50 mutase 2; mtROS, mitochondrial reactive oxygen species.

51

52 **Introduction**

53 Alpha-synuclein ( $\alpha$ syn) accumulation is believed to be a key step in the pathogenesis of Par-  
54 kinson's disease and related alpha-synucleinopathies. Despite predominant localization in the  
55 cytosol,  $\alpha$ syn is found localized to mitochondria in post-mortem Parkinson's disease brain  
56 (Devi *et al.*, 2008). Mitochondrial accumulation of  $\alpha$ syn has been associated with impairment  
57 of complex-I dependent respiration, decreased mitochondria membrane potential, and in-  
58 creased levels of mitochondrial reactive oxygen species (mtROS) in multiple cellular models  
59 (Hsu *et al.*, 2000; Devi *et al.*, 2008; Reeve *et al.*, 2015; Ludtmann *et al.*, 2018). The evidence  
60 supporting a contribution of abnormal accumulation of  $\alpha$ syn to disruption of mitochondrial  
61 processes is compelling and indicates a crucial role for  $\alpha$ syn-induced mitochondrial dysfunc-  
62 tion in Parkinson's disease pathogenesis and alpha-synucleopathies.

63 The sirtuins (SIRT) are a family of nicotinamide adenine dinucleotide (NAD<sup>+</sup>)-dependent  
64 deacetylases and/or adenosine diphosphate (ADP)-ribosyltransferases that have long been  
65 recognized as essential for cell survival, metabolism, and longevity (Kyrylenko *et al.*, 2010).  
66 In mammals there are seven human SIRT homologs (SIRT1–7) with varied enzymatic activi-  
67 ties. SIRT1, SIRT6, and SIRT7 predominantly reside in the nucleus whereas SIRT2 is located  
68 in the cytoplasm, and SIRT3, 4, and 5 reside in the mitochondria. SIRT3 is the predominant  
69 mitochondrial sirtuin and the major regulator of mitochondrial protein acetylation (Hebert *et*  
70 *al.*, 2013; Herskovits and Guarente, 2013; Gleave *et al.*, 2017). SIRT3 is expressed at high  
71 levels in the brain (Lombard *et al.*, 2007; Lopez-Otin *et al.*, 2013) and plays an important role  
72 in maintaining mitochondrial integrity, energy metabolism, and regulating mitochondrial oxi-  
73 dative pathways (Kong *et al.*, 2010; Bause and Haigis 2013). SIRT3-mediated deacetylation  
74 activates enzymes responsible for the reduction of ROS production, such as superoxide dis-  
75 mutase 2 (SOD2) (Ansari *et al.*, 2017). Interestingly, SIRT3 acts as a pro-survival factor in  
76 neurons exposed to excitotoxic injury (Kim *et al.*, 2011) and recent studies demonstrate a  
77 neuroprotective effect of SIRT3 in cell culture models of stroke, Huntington's disease, and  
78 Alzheimer's disease (Fu *et al.*, 2012; Weir *et al.*, 2012; Yin *et al.*, 2015). Importantly, and  
79 relevant to the present study, overexpression of SIRT3 was recently demonstrated to prevent  
80 dopaminergic cell loss in a rodent model of Parkinson disease (Gleave *et al.*, 2017).

81 Experimental evidence supports SIRT3-induced protection against oxidative stress by en-  
82 hancement of mitochondrial biogenesis and integrity (Liu *et al.*, 2017). The multifaceted mi-  
83 tochondrial health-enhancing capabilities of SIRT3 thus make it an attractive therapeutic tar-  
84 get for neurodegenerative diseases where mitochondrial dysfunction is believed to contribute

85 to disease pathogenesis. Herein, we investigate a role for SIRT3 in Parkinson disease pro-  
86 gression and identify a potential mechanistic interaction between SIRT3 and oligomeric  
87 forms of  $\alpha$ syn. We hypothesize that mitochondrial  $\alpha$ syn reduces SIRT3 deacetylase activity  
88 and contributes to mitochondrial dysfunction and pathogenesis in Parkinson disease and re-  
89 lated  $\alpha$ synucleinopathies. The data presented herein significantly advances our mechanistic  
90 understanding of SIRT3 in mitochondrial dysfunction and validates a protective role for  
91 SIRT3 in Parkinson disease. Overall we confirm the potential application of SIRT3 activators  
92 as prospective targets for pharmacological strategies against neurodegeneration in Parkinson  
93 disease and related alpha-synucleinopathies.

94

## 95 **Materials and methods**

### 96 **Cell culture**

97 A stable cell line co-expressing human  $\alpha$ syn fused to either the amino-terminal (SL1) or car-  
98 boxy-terminal fragment (SL2) of humanized *Gaussia princeps* luciferase was generated and  
99 described previously (Moussaud *et al.*, 2015). H4 SL1&SL2 cells were maintained at 37°C in  
100 a 95% air/5% CO<sub>2</sub> humidified incubator in Opti-MEM supplemented with 10% FBS. Stock  
101 cultures were kept in the presence of 1 $\mu$ g/ml tetracycline (Invitrogen) to block the expression  
102 of the transgenes (SL1&SL2).  $\alpha$ Syn expression is turned on or off by the absence (Tet- cells)  
103 or presence (Tet<sup>+</sup> cells) of tetracycline respectively.

### 104 **Rodent Stereotaxic surgery**

105 Adult female Sprague Dawley rats (225-250g, Envigo, USA) were housed and treated in ac-  
106 cordance with the NIH Guide for Care and Use of Laboratory animals. All animal procedures  
107 were approved by the Mayo Institutional Animal Care and Use Committee and are in accord-  
108 ance with the NIH Guide for Care and Use of Laboratory animals. All viral vector delivery  
109 surgical procedures and tissue processing was performed as previously described by our  
110 group (Delenclos *et al.*, 2016). Briefly, adeno-associated-virus (AAV) serotype2/8 expressing  
111 human  $\alpha$ syn fused with either the C-terminus (AAV-SL1) or N-terminus (AAV-SL2) of  
112 *Gaussia princeps* luciferase was produced by plasmid triple transfection with helper plasmids  
113 in HEK293T cells. 48 hours later, cells were harvested and lysed in the presence of 0.5% so-  
114 dium deoxycholate and 50U/ml Benzonase (Sigma-Aldrich, St. Louis, MO) by freeze-  
115 thawing, and the virus was isolated using a discontinuous iodixanol gradient. The genomic  
116 titer of each virus was determined by quantitative PCR. A combination of AAV-SL1

117 (8.1012gc/ml) + AAV-SL2 (8.1012 gc/ml) was delivered directly to the right substantia nigra  
118 (SN) using stereotaxic surgery (coordinates: AP -5.2mm, ML +2.0mm, DV +7.2mm from  
119 dura) (Paxinos and Watson, 1998). AAVs were infused at a rate of 0.4 $\mu$ L/min (final volume  
120 2 $\mu$ L) using a microinjector (Stoelting). A group of control animals were injected with 2 $\mu$ L of  
121 AAV8 expressing full length of humanized *Gaussia princeps* luciferase (AAV8-Hgluc).

## 122 **Human brain tissue**

123 Frozen human post-mortem brain was provided by the Mayo Clinic brain bank at the Mayo  
124 Clinic in Jacksonville. For this study, striatum (STR) samples from 10 control patients (6 fe-  
125 males, 4 males) and 10 patients diagnosed with Lewy body disease (4 females and 6 males)  
126 were included. Detailed information of brain tissues is provided in Table 1. Each frozen brain  
127 sample was weighed and homogenized in 10X volume of RIPA buffer (50mM Tris-HCl, pH  
128 7.4, 150mM NaCl, 1mM EDTA, 1mM EGTA, 1.2% Triton X-100, 0.5% sodium deoxycho-  
129 late, and 0.1% SDS) containing 1mM phenylmethylsulfonyl fluoride (PMSF), protease inhib-  
130 itor cocktail, and halt phosphatase inhibitor cocktail, followed by sonication and centrifuga-  
131 tion for 15 min at 16,000  $\times$  g at 4  $^{\circ}$ C to remove cellular debris. Supernatants were collected,  
132 protein concentration was determined by Bradford assay, and samples were processed for  
133 immunoblotting.

## 134 **Immunofluorescence**

135 Cells were cultured on 12-mm glass coverslips with or without 1 $\mu$ g/ml tetracycline for 72h.  
136 Cells were washed with phosphate-buffered saline (PBS) and incubated with 300nM with Mi-  
137 toTracker-Green (Molecular Probes, Inc., Eugene, OR, USA) according to the manufacturer's  
138 protocol to visualize mitochondria. Cells were fixed with 4% paraformaldehyde for 10min at  
139 room temperature (RT) and washed three times in 1X Tris-buffered saline (TBS) (500mM  
140 NaCl, 20 mM Tris, pH 7.4), blocked for 1h in 1.5% goat serum, 0.5% Triton X-100 in 1X  
141 TBS and incubated overnight at 4 $^{\circ}$ C with primary antibodies (SIRT3 and human  $\alpha$ syn). The  
142 following day cells were washed and treated with Alexa Fluor $^{\circledR}$  488 and 568 secondary anti-  
143 bodies for 1h at RT (see Table 2, for details of the antibodies used in the study). Coverslips  
144 were mounted on Super Frost Plus slides with Vectashield Hardset (Vector Labs, Burlingame,  
145 CA) and cells were visualized using an Axio observer inverted microscope (Carl Zeiss, Ger-  
146 many).

## 147 **Gaussia luciferase protein-fragment complementation assays**

148 Luciferase activity was measured in 15ug of cell lysate in a multilabel plate reader (EnVision,

149 PerkinElmer; Waltham, MA, USA) following the injection of the cell permeable substrate,  
150 coelenterazine (20mM, NanoLight).

### 151 **Western blotting analysis**

152 To prepare whole cell lysates, cells were washed twice with ice-cold PBS and total proteins  
153 were isolated by incubating the cells on ice in radio-immunoprecipitation assay (RIPA) lysis  
154 buffer (50mM Tris-HCl, pH 7.4, 150mM NaCl, 1mM EDTA, 1mM EGTA, 1.2% Triton X-  
155 100, 0.5% sodium deoxycholate, and 0.1% SDS) containing 1mM phenylmethylsulfonyl flu-  
156 oride (PMSF), protease inhibitor cocktail, and halt phosphatase inhibitor cocktail. Collected  
157 cells were sonicated on ice and centrifuged at  $10,000 \times g$  for 10min at 4°C. The protein con-  
158 centration was determined with Bradford reagent. 15µg proteins were separated on Bis-Tris  
159 polyacrylamide gradient gels (NuPAGE Novex 4-12% Bis-Tris Gel, Life tech) and trans-  
160 ferred to nitrocellulose (NC) membranes. Membranes were then blocked for 1h at RT in TBS-  
161 T (500mM NaCl, 20mM Tris, 0.1% Tween 20, pH 7.4) supplemented with 10% non-fat dried  
162 milk. Subsequently membranes were incubated overnight at 4°C with primary antibodies fol-  
163 lowed by 1h at RT with HRP-conjugated secondary antibodies (Table 2). Proteins were de-  
164 tected using an enhanced chemiluminescent detection system (ECL, EMD Millipore) and a  
165 CCD imaging system (LAS-4000, Fujifilm, Japan).

### 166 **Mitochondria/cytosol fractionation**

167 Cells were lysed in buffer A (0.25 M sucrose, 10mM Tris-HCl [pH 7.5], 10 mM KCl, 1.5  
168 mM MgCl<sub>2</sub>, 1 mM EDTA, 1 mM dithiothreitol, and 0.1 mM PMSF) with an homogenizer.  
169 Homogenates were centrifuged at  $700 \times g$  for 5min at 4°C, and supernatants were collected  
170 and centrifuged at  $10,000 \times g$  for 30min at 4°C. The supernatants were used as the cytosolic  
171 fraction, and the pellet was used as the mitochondrial fraction. The pellets were resuspended  
172 in buffer B (0.25M sucrose, 10mM Tris-HCl [pH 7.5], 10mM KCl, 1.5mM MgCl<sub>2</sub>, 1mM  
173 EDTA, 1 mM dithiothreitol, 0.1mM PMSF, and 1% NP 40). To confirm the purity of the mi-  
174 tochondrial fraction, the lysates were probed for the specific mitochondria marker cyto-  
175 chrome *c* oxidase IV (COXIV).

### 176 **Isolation of rat brain mitochondria**

177 Striatum (STR) and midbrain containing substantia nigra (SN) were dissected and homoge-  
178 nized in 0.5mL of ice-cold MIBA (10mM Tris-HCl [pH 7.4], 1mM EDTA, 0.2M D-mannitol,  
179 0.05M sucrose, 0.5mM sodium orthovanadate, 1mM sodium fluoride and dissolved in water)  
180 containing 1X protease inhibitors and hand-held homogenizer for 40 strokes on ice. The ho-

181 mogenate was transferred into 1.5 mL tubes and then centrifuged at  $500 \times g$  for 5min. The  
182 pellet was discarded, and remaining supernatant was centrifuged at  $11,000 \times g$  for 20min at  
183  $4^{\circ}\text{C}$ , yielding the heavy mitochondrial (HM, pellet) and the light mitochondrial (LM, super-  
184 natant) fraction. The HM pellet was washed twice with 1mL ice-cold MIBA buffer it was re-  
185 suspended in 0.1 - 0.3mL of MIBA to yield the final solution enriched in mitochondria.

### 186 **Mitochondrial respiration analysis**

187 The oxygen consumption rate (OCR) was assessed using a Seahorse Bioscience XF96 ana-  
188 lyzer (Seahorse Bioscience, Billerica, MA, USA) in combination with the Seahorse Biosci-  
189 ence XF Cell Mito Stress Test assay kit according to the manufacturer's recommendations.  
190 H4 SL1&SL2 cells were seeded in 12-wells of a XF 96-well cell culture microplate (Seahorse  
191 Bioscience, 102601-100) and grown to 70% confluency in 200 $\mu\text{L}$  of growth medium prior to  
192 analysis. On the day of assay, culture media were changed to assay medium with 175 $\mu\text{L}$   
193 (Dulbecco's Modified Eagle's Medium, D5030), supplemented with 25mM glucose, 2mM  
194 glutamine, and 2mM pyruvate. Prior to assay, plates were incubated at  $37^{\circ}\text{C}$  for 1h without  
195  $\text{CO}_2$ . Thereafter successive OCR measurements were performed consisting of basal OCR,  
196 followed by OCR level after the automated injection of 25 $\mu\text{l}$  oligomycin (20 $\mu\text{M}$ ), 25 $\mu\text{l}$  car-  
197 bonyl cyanide 4-(trifluoromethoxy) phenylhydrazone (FCCP) (20 $\mu\text{M}$ ), and a combination of  
198 25 $\mu\text{l}$  rotenone + antimycin A (12 $\mu\text{M}$ ), respectively. After the assays, plates were saved and  
199 OCR was normalized to the total protein amount per well.

### 200 **SIRT3 siRNA transfection**

201 Small interfering RNAs (siRNAs) for human SIRT3 (sc-61555, Santa Cruz Biotechnology,  
202 CA, USA) and control non-target siRNA (SN-1003, Negative Control, Bioneer, Daejeon, Ko-  
203 rea) were reconstituted in siRNA buffer (Qiagen, CA) following the manufacturer's instruc-  
204 tions and transfections of SL1SL2 cells conducted using Lipofectamine 3000 reagent (Invi-  
205 trogen, CA, USA). Briefly H4 SL1&SL2 cells were seeded in 6-well culture plate 24h before  
206 transfection. Subconfluent cells were treated either with SIRT3 siRNA (100nM) or non-  
207 targeting siRNA (20nM) complexed with Lipofectamine for 3h. The extent of knockdown  
208 was evaluated by western blot analysis.

### 209 **Determination of mitochondrial ROS**

210 MitoSOX<sup>TM</sup> Red fluorescent probe (Molecular Probes, Inc., Eugene, OR, USA) was used to  
211 visualize mitochondrial superoxide production according to the manufacturer's protocol.  
212 Briefly, H4 SL1&SL2 grown on 12-mm glass were washed twice with PBS to remove the

213 medium and incubated with 2.5 $\mu$ M MitoSOX Red reagent in the dark at 37°C. Cells were  
214 washed gently three times with warm PBS buffer and imaged immediately after, under fluo-  
215 rescence microscopy.

### 216 **Statistical analysis**

217 All data were analyzed by the Graph Pad Prism 7 software (San Diego, CA) and statistical  
218 significance was determined by one-way ANOVA analysis of variance with Tukey's multiple  
219 comparisons test. Results presented as mean  $\pm$  standard error of the mean (S.E.M.). For iso-  
220 lated mitochondria studies *in vivo*, a Mann-Whitney U test was used to analyze the Western  
221 blots, Differences were considered to be statistically significant with \*P< 0.05, \*\*P< 0.01,  
222 #P< 0.05, ##P< 0.01, and n.s, not statistically significant (p > 0.05).

### 223 **Data Availability**

224 Data sharing is not applicable to this article as no new data were created or analyzed in this  
225 study.

226

### 227 **Results**

#### 228 **Increased $\alpha$ syn oligomers in mitochondria correlate with decreased SIRT3 protein levels**

229 Although it has been described previously that  $\alpha$ syn localizes to mitochondria and  $\alpha$ syn over-  
230 expressing cells exhibit mitochondrial dysfunction (Devi *et al.*, 2008; Marongiu *et al.*, 2009;  
231 Nakamura *et al.*, 2011) the relationship between  $\alpha$ syn oligomers and mitochondria in patho-  
232 logic conditions and the mechanisms whereby  $\alpha$ syn induces mitochondrial dysfunction are  
233 still poorly understood. Herein, we use a previously described inducible cell model of human  
234  $\alpha$ syn overexpression that results in formation of intracellular oligomeric species over time  
235 (Moussaud *et al.*, 2015). This tetracycline-off (Tet-off) stable cell line facilitates monitoring  
236 of  $\alpha$ syn oligomerization *in situ* via a split luciferase protein-fragment complementation assay.  
237 To determine if  $\alpha$ syn oligomeric species are localized within mitochondria, cells were har-  
238 vested at various time points after tetracycline removal, mitochondrial-enriched fractions  
239 were isolated, and luciferase activity was measured as a surrogate for  $\alpha$ syn oligomeric species.  
240 Luciferase activity increased in a time-dependent manner in both the mitochondrial (Fig. 1A  
241 and B) and cytosolic fractions (Suppl. Fig. 1A) of the cells. Increased  $\alpha$ syn oligomers were  
242 confirmed by the detection of increased high molecular weight species in both compartments  
243 72h after removal of tetracycline (Suppl. Fig. 1B). GAPDH and COXIV immunoblotting



244 confirmed purity of mitochondrial fractionation (Figs. 1A and B). Interestingly, the increase  
245 in mitochondrial-localized  $\alpha$ syn oligomers was accompanied by a decrease in SIRT3 protein  
246 levels beginning 12h after  $\alpha$ syn expression was turned on, and becoming significant by 24h  
247 (Fig. 1A). Immunocytochemistry confirmed decreased SIRT3 immunofluorescence in cells  
248 accumulating  $\alpha$ syn oligomers (Suppl. Fig. 1C, Tet- 72h) compared to control (Suppl. Fig. 1C,  
249 Tet+ 72h). In support of a  $\alpha$ syn-mediated effect on SIRT3 levels, knockdown of SIRT3 in-  
250 creased  $\alpha$ syn oligomers with a corresponding increase in  $\alpha$ syn protein levels (Figs. 1C and D).

### 251 **Mitochondrial oligomeric $\alpha$ syn induces SIRT3 inactivation via AMPK $\alpha$ -CREB signaling** 252 **pathway**

253 SIRT3 regulates the synthesis of ATP by modulating AMP-activated protein kinase (AMPK),  
254 which acts as a sensor of cellular homeostasis. Cells with decreased SIRT3 function show  
255 reduced AMPK $\alpha$  phosphorylation (Shi *et al.*, 2005; Lombard *et al.*, 2007; Pillai *et al.*, 2010)  
256 and reduced phosphorylation and activity of cAMP response element binding protein  
257 (CREB). In addition, previous studies have shown that overexpression of  $\alpha$ syn reduces  
258 AMPK $\alpha$  activation in neuronal cells (Dulovic *et al.*, 2014). Because expression of  $\alpha$ syn oli-  
259 gomers in mitochondria results in decreased SIRT3 expression, we next examined the levels  
260 of p-AMPK $\alpha$  and p-CREB. At 72h, when SIRT3 expression is significantly decreased and  
261 mitochondrial  $\alpha$ syn oligomers are present (Fig. 1A), we detected a significant decrease in p-  
262 AMPK $\alpha$  (Thr172) and p-CREB (Ser133) (Fig. 2A and B). AMPK $\alpha$ -CREB signaling was also  
263 decreased in cells transfected with SIRT3 siRNA compared to control siRNA (Supplementary  
264 Fig. 2). To further validate modulation of the AMPK $\alpha$ -CREB signaling pathway by mito-  
265 chondrial  $\alpha$ syn oligomers we asked whether treatment with 5-aminoimidazole-4-  
266 carboxamide-1- $\beta$ -d-ribofuranoside (AICAR), an AMPK $\alpha$  agonist, could prevent  $\alpha$ syn-  
267 induced changes in mitochondrial SIRT3 and associated signaling proteins. SL1&SL2 cells  
268 were treated with 2 mM AICAR for 2h in accordance with a previous study (Takeuchi *et al.*,  
269 2013), and harvested 72h after tetracycline removal. A significant increase in p-AMPK $\alpha$  and  
270 p-CREB levels was observed (Fig. 2A, #P<0.05) and importantly, led to a partial restoration  
271 of SIRT3 levels to control levels (Fig. 2B, #P<0.05) and significantly decreased the level of  
272  $\alpha$ syn oligomers (Fig. 2C). Because SIRT3 is a deacetylase known to modulate the acetylation  
273 of SOD2 (Qiu *et al.*, 2010), we examined the level of acetylated SOD2 in cells overexpress-  
274 ing  $\alpha$ syn oligomers. Acetylated SOD2 (K68) was significantly increased in cells overexpress-  
275 ing  $\alpha$ syn compared to control (Fig. 2D, \*\*P<0.01), consistent with reduced SIRT3 levels and  
276 activity. Of note,  $\alpha$ syn overexpression had no effect on total SOD2 levels which remained

277 consistent in all conditions (Fig. 2D).

### 278 **SIRT 3 activation attenuates $\alpha$ syn-induced mitochondrial ROS**

279 Because SIRT3 plays a crucial role in modulating ROS and limiting the oxidative damage of  
280 cellular components (Torrens-Mas *et al.*, 2017), we asked whether mitochondrial  $\alpha$ syn oli-  
281 gomers induce oxidative stress that can be rescued with SIRT3 activation. Cells overexpress-  
282 ing  $\alpha$ syn were stained with mitotracker red to visualize mitochondria and MitoSOX to moni-  
283 tor mitochondrial ROS production. Fluorescence microscopy revealed increased ROS at 72h  
284 compared to control condition (Tet+ 72h) (Fig. 3A). As predicted, AICAR-treatment reduced  
285 ROS production (Fig. 3A, bottom row). Increased oxidative stress and ROS can induce the  
286 expression of heme oxygenase-1 (HO-1) (Bansal *et al.*, 2013) and increased HO-1 mRNA  
287 and protein expression have been reported in a wide spectrum of diseases including neuro-  
288 degenerative diseases such as Parkinson disease (Shipper *et al.*, 1998; Song *et al.*, 2009). In  
289 line with these data, we found a significant increase of HO-1 in cells expressing  $\alpha$ syn for 72h  
290 (Fig. 3B), and a concomitant decrease of HO-1 in cells treated with AICAR compared to con-  
291 trol (Tet+ 72h) (Fig. 3B, P= n.s).

### 292 **$\alpha$ Syn impairs mitochondrial dynamics and bioenergetics which can be rescued by acti- 293 vation of SIRT3**

294 Mitochondrial dynamics (fission/fusion) play a critical role in maintaining mitochondrial  
295 health, with the balance between fission (DRP1) and fusion (OPA1) proteins being crucial for  
296 neuronal function and survival. Changes in the expression and/or localization of fis-  
297 sion/fusion proteins can impair this process and induce cell death. To determine the effect of  
298  $\alpha$ syn oligomers on mitochondrial dynamics, we examined the expression of DRP1 and OPA1.  
299 In the presence of  $\alpha$ syn oligomers, DRP1 is recruited from the cytosol to the mitochondria  
300 (Fig. 4A). Consistent with the fact that phosphorylation of DRP1 at serine 616 activates mito-  
301 chondrial fission, we detected increased levels of p-DRP1 in cells overexpressing  $\alpha$ syn  
302 (Suppl. Fig. 3). By contrast, OPA1 protein levels decreased over time in the mitochondrial  
303 fraction (Fig. 4A), consistent with a decrease in mitochondrial fusion. Several lines of evi-  
304 dence suggest that a decrease in OPA1 and the translocation of DRP1 to the mitochondria are  
305 crucial events that lead to mitochondrial fragmentation. When we evaluated the effect of  
306 AICAR on mitochondria dynamics we found OPA1 level in mitochondria restored (Fig. 4B)  
307 and phosphorylation of DRP1 significantly decreased (Fig. 4C). To determine if accumulation  
308 of  $\alpha$ syn in the mitochondria affects cellular bioenergetics we measured the oxygen consump-  
309 tion rate (OCR) in cell lysates using the Seahorse XF96 analyzer. The OCR was measured

310 under basal conditions followed by the sequential addition of oligomycin (ATP synthase in-  
311 hibitor), carbonyl cyanide 4-(trifluoromethoxy) phenylhydrazone (FCCP; mitochondrial un-  
312 coupler), and rotenone plus antimycin A (Complex I and III inhibitor) to assess ATP produc-  
313 tion, maximal respiration, and spare capacity respectively. Cells overexpressing  $\alpha$ syn had  
314 significantly decreased OCR in all paradigms tested when compared to control cells (Tet+)  
315 (Figs. 5A - E). This is highly suggestive of a mitochondria respiratory deficit in the presence  
316 of mitochondrial  $\alpha$ syn oligomers. We next analyzed the OCR of cells treated with AICAR  
317 and found that AICAR treatment was able to significantly restore the OCR level of basal res-  
318 piration (Fig. 5B, #P <0.05) to the level of control and partially rescue ATP production and  
319 maximal respiration (Figs. 5C and D) with a trend toward restoration of spare capacity ob-  
320 served (Fig. 5E). Taken together, our data support a hypothesis whereby increased mitochon-  
321 drial  $\alpha$ syn results in decreased mitochondrial function via a SIRT3-dependent cascade of  
322 events that can be rescued by restoring SIRT3 levels using an AMPK $\alpha$  agonist.

### 323 **SIRT3 deficit is also present *in vivo***

324 Although a very recent study demonstrated that overexpression of SIRT3 in a rodent model of  
325  $\alpha$ syn overexpression could rescue  $\alpha$ syn-induced cell loss in the substantia nigra (SN) pars  
326 compacta (Gleave *et al.*, 2017), the mechanism by which SIRT3 exerts its neuroprotective  
327 effects was not addressed. To confirm the findings of the previous study and determine if  
328 similar mechanisms are at play *in vivo* to those described in our cellular studies, we used a  
329 rodent model whereby accumulation of  $\alpha$ syn oligomers in the SN and striatum (STR) after 4  
330 weeks is accompanied by significant loss of dopaminergic neurons. We have previously  
331 shown that unilateral injection of AAV2/8-human  $\alpha$ syn into SN of adult rat results in abun-  
332 dant expression of  $\alpha$ syn oligomeric species in both cell bodies and axon terminals of the ni-  
333 grostriatal pathway (Delenclos *et al.*, 2016). Here, we performed cellular fractionation of  
334 nigral and striatal tissue 4 weeks after viral transduction and assessed cytosolic and mito-  
335 chondrial fractions for SIRT3 levels in the ipsilateral (injected) side of the brain. Consistent  
336 with our *in vitro* data, accumulation of  $\alpha$ syn in SN was accompanied by a significant decrease  
337 in SIRT3 protein levels (Fig. 6A, \*\*P < 0.01). At this time point no differences were detected  
338 in SIRT3 levels between the ipsilateral and control/uninjected side in the STR. Of note, there  
339 was no difference in SIRT3 levels in SN in control animals that received an injection of  
340 AAV8 expressing gaussia luciferase only (Suppl. Fig. 4A). Furthermore, examination of  
341 OPA1 and DRP1 levels in our rodent model revealed results consistent with our *in vitro* data,  
342 with DRP1 significantly increased in the injected SN (Fig. 6B, \*P<0.05) and OPA1 signifi-

343 cantly decreased (Fig. 6B, \* $P < 0.05$ ). Lastly, AMPK $\alpha$ -CREB signaling was downregulated in  
344 the SN of these animals (Suppl. Fig. 4B), mimicking once again our *in vitro* observation.

### 345 **SIRT3 levels are decreased in human Lewy body disease brains.**

346 Lastly, we assessed the level of SIRT3 in human post mortem brain with a confirmed neuro-  
347 pathological diagnosis of Lewy body disease (LBD) (Table 1). Frozen striatal tissue from 10  
348 LBD and 10 healthy controls was homogenized, run on SDS-PAGE, and probed with anti-  
349 bodies to detect SIRT3, OPA1, and DRP1. Western blot analyses showed significantly re-  
350 duced expression of SIRT3 in LBD brains compared to controls (Fig. 7A and B). We also  
351 detected reduced expression of OPA1 protein but no significant difference in the level of  
352 DRP1 compared to controls (Fig. 7A and B). Brains from both sexes were utilized but there  
353 was no difference in the interpretation of the data when stratified by sex (data not shown).  
354 Together, these results are consistent with our findings from cell and rodent models with de-  
355 creased SIRT3 protein levels when  $\alpha$ syn accumulates and aggregates in neurons.

356

## 357 **Discussion**

358 Herein, we identify a cellular mechanism that explains how mitochondrial  $\alpha$ syn oligomers  
359 lead to mitochondrial dysfunction and the initiation of a self-perpetuating cycle of aggrega-  
360 tion and deficient cellular metabolism that eventually results in cell death. For the first time  
361 we identify decreased SIRT3 activity as a consequence of  $\alpha$ syn oligomer accumulation in mi-  
362 tochondria in multiple model systems including cell models, animal models, and human post-  
363 mortem brains with a neuropathological diagnosis of LBD. We demonstrate the presence of  
364  $\alpha$ syn oligomers in mitochondria correlate with decreased mitochondrial function and de-  
365 creased SIRT3 expression and function. Interestingly, we show that SIRT3 downregulation is  
366 accompanied by dysregulation of AMPK signaling pathway, perturbation of fusion/fission  
367 mechanisms, and impairment of basal respiration, all of which contribute to increase ROS  
368 and mitochondrial dysfunction. These findings are observed not only in an experimental cel-  
369 lular model, but also in a rodent model of  $\alpha$ syn aggregation, and more importantly, in human  
370 post mortem LBD brain. Lastly, treatment with an AMPK agonist, AICAR, improves  $\alpha$ syn-  
371 induced mitochondrial dysfunction by restoring SIRT3 expression and decreasing  $\alpha$ syn oli-  
372 gomer formation. Overall, these results demonstrate the health enhancing capabilities of  
373 SIRT3 and validate its potential as a new therapeutic target for Parkinson disease and related  
374 disorders.

375 Mitochondrial dysfunction has been linked to the pathogenesis of neurodegenerative dis-  
376 eases including Parkinson disease, with mutations identified in mitochondrial-associated pro-  
377 teins such as PINK1 and parkin causing familial Parkinson disease (Schapira *et al.*, 1993;  
378 Dawson *et al.*, 2003).  $\alpha$ Syn, a major neuropathological hallmark of Parkinson disease and  
379 alpha-synucleinopathies can perturb mitochondria and previous studies have shown that  
380 overexpression of  $\alpha$ syn has dramatic effects on mitochondrial morphology, reduces respirato-  
381 ry chain complex activity, and impairs mitochondrial functions *in vitro* and *in vivo* (Siddiqui  
382 *et al.*, 2012; Bobela *et al.*, 2017). Accumulation of wild-type  $\alpha$ syn and truncated species  
383 within the mitochondria has been described (Sarafian *et al.*, 2013; Subramaniam *et al.*, 2014)  
384 however, no study has definitively demonstrated the presence of oligomeric  $\alpha$ syn species in  
385 mitochondria. Here, we used a split luciferase protein complementation assay to demonstrate  
386 accumulation of  $\alpha$ syn oligomers in the mitochondrial fraction of cells in culture and in rat  
387 brain homogenates. We speculate that the presence of oligomeric  $\alpha$ syn species triggers a cas-  
388 cade of events leading to mitochondria malfunction associated with Parkinson disease patho-  
389 genesis. Deficiency of SIRT3 is observed in cellular models of Huntington's disease (Fu *et*  
390 *al.*, 2012) and down regulation of SIRT3 increases dopaminergic cell death in an MPTP  
391 mouse model of Parkinson disease (Liu *et al.*, 2015). Most recently, overexpression of SIRT3  
392 was demonstrated to prevent  $\alpha$ syn-induced neurodegeneration in a rodent AAV model  
393 (Gleave *et al.*, 2017). In humans, down downregulation of SIRT3 has been previously report-  
394 ed in post-mortem human Alzheimer disease brain (Han *et al.*, 2014; Lee *et al.*, 2018).

395 SIRT3 is emerging as an important regulator of cellular biogenesis and oxidative stress.  
396 Recent evidence supports attenuation of ROS and improved mitochondrial bioenergetics up-  
397 on activation of SIRT3 (Ramesh *et al.*, 2018), while SIRT3 knockdown exacerbates ROS  
398 production (Zhang *et al.*, 2016). The current school of thought is that SIRT3 induces neuro-  
399 protection by enhancing mitochondrial biogenesis and integrity, perhaps by increasing mito-  
400 chondrial DNA content and suppressing SOD activity (Dai *et al.*, 2014 a,b; Zhang *et al.*,  
401 2016; Liu *et al.*, 2017). AMPK is upstream of SIRT3 in the signaling pathway that regulates  
402 gene expression and the activity of nicotinamide phosphoribosyl transferase (NAMPT) (Ful-  
403 co *et al.*, 2008; Costford *et al.*, 2010). SIRT3 also seems to be under the control of  
404 AMPK/CREB-PGC-1 $\alpha$  signaling pathway known to have a crucial role in the regulation of  
405 mitochondrial biogenesis and function, activating mitochondrial enzymes involved in antiox-  
406 idant defenses and metabolism (Shi *et al.*, 2005; Kong *et al.*, 2010; Abdel Khalek *et al.*,  
407 2014). Here, we tested the hypothesis that the AMPK/CREB signaling pathway plays an im-  
408 portant role in  $\alpha$ syn-induced SIRT3 down-regulation. Overexpression of oligomeric  $\alpha$ syn sig-

409 nificantly decreased levels of p-AMPK $\alpha$  and p-CREB both *in vitro* and *in vivo*. Moreover,  
410 pharmacological activation of AMPK by AICAR was able to restore levels of p-AMPK $\alpha$  and  
411 p-CREB, and increase mitochondrial SIRT3 protein expression. Most importantly, we found  
412 that activating AMPK significantly reduced the level of  $\alpha$ syn oligomers in our cellular model  
413 system. These data raise the question of whether modulating SIRT3 levels will alleviate  $\alpha$ syn-  
414 induced pathology and slow or halt  $\alpha$ syn-induced cellular dysfunction in Parkinson disease  
415 and related synucleinopathies.

416 Mitochondria are dynamic organelles that continuously undergo fission and fusion, pro-  
417 cesses necessary for cell survival and adaptation to changing energy requirements for cell  
418 growth, division, and distribution of mitochondria during differentiation (van der Blik *et al.*,  
419 2013). Our results demonstrate that mitochondrial dynamics are modified by the presence of  
420  $\alpha$ syn oligomers in mitochondria. Impaired fission/fusion balance is demonstrated herein by  
421 reduced levels of OPA1, and increased DRP1 and phosphorylated DRP1. Under stress condi-  
422 tions, DRP1 is recruited to mitochondria where it initiates mitochondrial fission and induces  
423 mitochondrial dysfunction. DRP1 activity is regulated by several post-translational modifica-  
424 tions including phosphorylation at Serine 616 (Elgass *et al.*, 2013), which rapidly activates  
425 DRP1 and stimulates mitochondrial fission during mitosis (Cho *et al.*, 2013; Sanchis-Gomar  
426 and Derbré, 2014). When  $\alpha$ syn oligomers localize to mitochondria, we observe an accompa-  
427 nying decrease in OPA1, driving mitochondria dynamics toward fission and fragmentation,  
428 indicating that  $\alpha$ syn oligomers induce mitochondrial dysfunction by regulating mitochondrial  
429 dynamics. AICAR-treatment was able to restore OPA1 and DRP1 protein expression to con-  
430 trol levels, subsequently resulting in improved mitochondrial function, indicating that SIRT3  
431 plays an important role in regulating of maintenance of mitochondrial function during stress.

432 Our results identify a mechanism whereby mitochondrial  $\alpha$ syn oligomers contribute to  
433 impaired mitochondrial respiration and impaired mitochondrial dynamics by disrupting  
434 AMPK/CREB/SIRT3 signaling. These data are consistent with a very recent study demon-  
435 strating interaction of  $\alpha$ syn with ATP synthase in the mitochondria and impairment of com-  
436 plex I-dependent respiration (Ludtmann *et al.*, 2018). Additionally, previous studies have  
437 shown that  $\alpha$ syn can also interact with TOM20 (Di Maio *et al.*, 2016), which is required for  
438 mitochondrial protein import, and decrease its function. SIRT3 is reported to exist in the cy-  
439 toplasm in an inactive form and recruited to the mitochondria upon stress (Anamika *et al.*,  
440 2017). It is tempting to speculate that TOM20 plays a role in the translocation of SIRT3 to  
441 mitochondria and that  $\alpha$ syn-induced deficit in protein import result in reduced mitochondrial

442 SIRT3 levels thereby initiating the cascade of mitochondrial dysfunction that results in de-  
443 creased mitochondrial bioenergetics. Further studies will be necessary to determine if there is  
444 any substance to this speculation and additional studies should address the role of SIRT3  
445 deacetylation substrates as possible players in Parkinson disease pathogenesis. Taken togeth-  
446 er, our study opens the door to the use of SIRT3 activators as potential therapeutics for resto-  
447 ration of mitochondrial deficits and decrease in  $\alpha$ syn-induced pathophysiology.

#### 448 **Acknowledgements**

449 We thank Dr. Dennis Dickson, Dr. Michael DeTure, and the Mayo Clinic Brain bank for hu-  
450 man post-mortem brain samples used in this study.

#### 451 **Funding**

452 Funded in part by the Mayo Foundation. MD is supported in part by the Mangurian Founda-  
453 tion for LBD research.

454 **References**

- 455 Abdel Khalek W, Cortade F, Ollendorff V, Lapasset L, Tintignac L, Chabi B, et al. SIRT3, a  
456 mitochondrial NAD<sup>+</sup>-dependent deacetylase, is involved in the regulation of myoblast  
457 differentiation. *PLoS One* 2014; 9:e114388.
- 458 Anamika, Khanna A, Acharjee P, Acharjee A, Trigun SK. Mitochondrial SIRT3 and neurode-  
459 generative brain disorders. [Review]. *J Chem Neuroanat* 2017; In Press.
- 460 Ansari A, Rahman MS, Saha SK, Saikot FK, Deep A, Kim KH. Function of the SIRT3 mito-  
461 chondrial deacetylase in cellular physiology, cancer, and neurodegenerative disease. *Ag-  
462 ing Cell* 2017; 16: 4-16.
- 463 Bansal S, Biswas G, Avadhani NG. Mitochondria-targeted heme oxygenase-1 induces oxida-  
464 tive stress and mitochondrial dysfunction in macrophages, kidney fibroblasts and in  
465 chronic alcohol hepatotoxicity. *Redox Biol* 2013; 2: 273-83.
- 466 Bause AS, Haigis MC. SIRT3 regulation of mitochondrial oxidative stress. *Exp Gerontol*  
467 2013; 48: 634-39.
- 468 Bobela W, Nazeeruddin S, Knott G, Aebischer P, Schneider BL. Modulating the catalytic ac-  
469 tivity of AMPK has neuroprotective effects against  $\alpha$ -synuclein toxicity. *Mol Neuro-  
470 degener* 2017; 12: 80.
- 471 Cho B, Choi SY, Cho HM, Kim HJ, Sun W. Physiological and pathological significance of  
472 dynamin- related protein 1 (Drp1)-dependent mitochondrial fission in the nervous system.  
473 *Exp Neurobiol* 2013; 22: 149–57.
- 474 Costford SR, Bajpeyi S, Pasarica M, Albarado DC, Thomas SC, Xie H, Church TS, Jubrias  
475 SA, Conley KE, Smith SR. Skeletal muscle NAMPT is induced by exercise in humans.  
476 *Am J Physiol Endocrinol Metab* 2010; 298: E117-26.
- 477 Dai SH, Chen T, Wang YH, Zhu J, Luo P, Rao W, et al. Sirt3 protects cortical neurons against  
478 oxidative stress via regulating mitochondrial Ca<sup>2+</sup> and mitochondrial biogenesis. *Int J  
479 Mol Sci* 2014a; 15: 14591-609.
- 480 Dai SH, Chen T, Wang YH, Zhu J, Luo P, Rao W, et al. Sirt3 attenuates hydrogen peroxide  
481 induced oxidative stress through the preservation of mitochondrial function in HT22 cells.  
482 *Int J Mol Med*. 2014b; 34:1159-68.
- 483 Dawson TM, Dawson VL. Molecular pathways of neurodegeneration in Parkinson's disease.  
484 [Review]. *Science* 2003; 302: 819–22.
- 485 Delenclos M, Trendafilova T, Jones DR, Moussaud S, Baine AM, Yue M, et al. A Rapid,  
486 Semi-Quantitative Assay to Screen for Modulators of Alpha-Synuclein Oligomerization  
487 Ex vivo. *Front Neurosci* 2016; 9: 511.



- 488 Devi L, Raghavendran V, Prabhu BM, Avadhani NG, Anandatheerthavarada HK. Mitochon-  
489 drial import and accumulation of alpha-synuclein impair complex I in human dopaminer-  
490 gic neuronal cultures and Parkinson disease brain. *J Biol Chem* 2008; 283:9089-100.
- 491 Di Maio R, Barrett PJ, Hoffman EK, Barrett CW, Zharikov A, Borah A, et al.  $\alpha$ -Synuclein  
492 binds to TOM20 and inhibits mitochondrial protein import in Parkinson's disease. *Sci*  
493 *Transl* 2016; 8: 342ra78.
- 494 Dulovic M, Jovanovic M, Xilouri M, Stefanis L, Harhaji-Trajkovic L, Kravic-Stevovic T, et  
495 al. The protective role of AMP-activated protein kinase in alpha-synuclein neurotoxicity  
496 in vitro. *Neurobiol Dis* 2014; 63: 1-11.
- 497 Elgass K, Pakay J, Ryan MT, Palmer CS. Recent advances into the understanding of mito-  
498 chondrial fission. *Biochim Biophys Acta* 2013; 1833: 150-61.
- 499 Fu J, Jin J, Cichewicz RH, Hageman SA, Ellis TK, Xiang L, et al. Trans(-)- $\epsilon$ -Viniferin in-  
500 creases mitochondrial sirtuin 3 (SIRT3), activates AMP-activated protein kinase (AMPK),  
501 and protects cells in models of Huntington Disease. *J Biol Chem* 2012; 287:24460-72.
- 502 Fulco M, Cen Y, Zhao P, Hoffman EP, McBurney MW, Sauve AA, et al. Glucose restriction  
503 inhibits skeletal myoblast differentiation by activating SIRT1 through AMPK-mediated  
504 regulation of Nampt. *Dev Cell* 2008; 14: 661-73.
- 505 Gleave JA, Arathoon LR, Trinh D, Lizal KE, Giguère N, Barber JHM, et al. Sirtuin 3 rescues  
506 neurons through the stabilisation of mitochondrial biogenetics in the virally-expressing  
507 mutant  $\alpha$ -synuclein rat model of parkinsonism. *Neurobiol Dis* 2017; 106: 133-46.
- 508 Han P, Tang Z, Yin J, Maalouf M, Beach TG, Reiman EM, et al. Pituitary adenylate cyclase-  
509 activating polypeptide protects against  $\beta$ -amyloid toxicity. *Neurobiol Aging* 2014;  
510 35:2064-71.
- 511 Hebert AS, Dittenhafer-Reed KE, Yu W, Bailey DJ, Selen ES, Boersma MD, et al. Calorie  
512 restriction and SIRT3 trigger global reprogramming of the mitochondrial protein acety-  
513 lome. *Mol Cell* 2013; 49: 186-99.
- 514 Herskovits AZ, Guarente L. Sirtuin deacetylases in neurodegenerative diseases of aging. [Re-  
515 view]. *Cell Res* 2013; 23: 746-58.
- 516 Hsu LJ, Sagara Y, Arroyo A, Rockenstein E, Sisk A, Mallory M, et al. alpha-synuclein pro-  
517 motes mitochondrial deficit and oxidative stress. *Am J Pathol* 2000; 157: 401-10.
- 518 Kim SH, Lu HF, Alano CC. Neuronal Sirt3 protects against excitotoxic injury in mouse corti-  
519 cal neuron culture. *PLoS One* 2011; 6: e14731.
- 520 Kong X, Wang R, Xue Y, Liu X, Zhang H, Chen Y, et al. Sirtuin 3 a new target of PGC-1 $\alpha$ ,  
521 plays an important role in the suppression of ROS and mitochondrial biogenesis. *PLoS*

- 522 One 2010; 5: e11707.
- 523 Kyrylenko S, Baniahmad A. Sirtuin family: a link to metabolic signaling and senescence.  
524 Curr Med Chem 2010; 17: 2921-32.
- 525 Lee J, Kim Y, Liu T, Hwang YJ, Hyeon SJ, Im H, et al. SIRT3 deregulation is linked to mito-  
526 chondrial dysfunction in Alzheimer's disease. Aging Cell 2018; 17: doi:  
527 10.1111/ace1.12679.
- 528 Liu J, Li D, Zhang T, Tong Q, Ye RD, Lin L. SIRT3 protects hepatocytes from oxidative inju-  
529 ry by enhancing ROS scavenging and mitochondrial integrity. Cell Death Dis 2017;  
530 8:e3158.
- 531 Liu L, Peritore C, Ginsberg J, Kayhan M, Donmez G. SIRT3 attenuates MPTP-induced ni-  
532 grostriatal degeneration via enhancing mitochondrial antioxidant capacity. Neurochem  
533 Res 2015; 40: 600-8.
- 534 Lombard DB, Alt FW, Cheng HL, Bunkenborg J, Streeper RS, Mostoslavsky R, et al. Mam-  
535 malian Sir2 homolog SIRT3 regulates global mitochondrial lysine acetylation. Mol Cell  
536 Biol 2007; 27: 8807-14.
- 537 López-Otín C, Blasco MA, Partridge L, Serrano M, Kroemer G. The hallmarks of aging.  
538 [Review]. Cell 2013; 153: 1194–217.
- 539 Ludtmann MHR, Angelova PR, Horrocks MH, Choi ML, Rodrigues M, Baev AY, et al.  $\alpha$ -  
540 Synuclein oligomers interact with ATP synthase and open the permeability transition pore  
541 in Parkinson's disease. Nat Commun. 2018 Jun 12;9(1):2293. doi: 10.1038/s41467-018-  
542 04422-2.
- 543 Marongiu R, Spencer B, Crews L, Adame A, Patrick C, Trejo M, et al. Mutant Pink1 induces  
544 mitochondrial dysfunction in a neuronal cell model of Parkinson's disease by disturbing  
545 calcium flux. J Neurochem 2009; 108: 1561–74.
- 546 Moussaud S, Malany S, Mehta A, Vasile S, Smith LH, McLean PJ. Targeting  $\alpha$ -synuclein  
547 oligomers by protein-fragment complementation for drug discovery in synucleinopathies.  
548 Expert Opin Ther Targets 2015; 19: 589-603.
- 549 Nakamura K, Nemani VM, Azarbal F, Skibinski G, Levy JM, Egami K, et al. Direct mem-  
550 brane association drives mitochondrial fission by the Parkinson disease-associated protein  
551 alpha-synuclein. J Biol Chem 2011; 286: 20710–26.
- 552 Paxinos G, Watson, C. The Rat Brain in Stereotaxic Coordinates (4th ed). San Diego, CA:  
553 Academic Press; 1998.
- 554 Pillai VB, Sundaresan NR, Kim G, Gupta M, Rajamohan SB, Pillai JB, et al. Exogenous  
555 NAD blocks cardiac hypertrophic response via activation of the SIRT3-LKB1-AMP-

- 556        activated kinase pathway. *J Biol Chem* 2010; 285: 133-3144.
- 557    Qiu X, Brown K, Hirschey MD, Verdin E, Chen D. Calorie restriction reduces oxidative  
558        stress by SIRT3-mediated SOD2 activation. *Cell Metab* 2010; 12: 662–7.
- 559    Ramesh S, Govindarajulu M, Lynd T, Briggs G, Adamek D, Jones E, et al. SIRT3 activator  
560        Honokiol attenuates  $\beta$ -Amyloid by modulating amyloidogenic pathway. *PLoS One*  
561        2018;13: e0190350.
- 562    Reeve AK, Ludtmann MH, Angelova PR, Simcox EM, Horrocks MH, Klenerman D, et al.  
563        Aggregated  $\alpha$ -synuclein and complex I deficiency: exploration of their relationship in dif-  
564        ferentiated neurons. *Cell Death Dis* 2015; 6: e1820.
- 565    Sanchis-Gomar F, Derbré F. Mitochondrial fission and fusion in human diseases. *N Engl J*  
566        *Med* 2014; 370: 1073-74.
- 567    Sarafian TA, Ryan CM, Souda P, Masliah E, Kar UK, Vinters HV, et al. Impairment of mito-  
568        chondria in adult mouse brain overexpressing predominantly full-length, N-terminally  
569        acetylated human  $\alpha$ -synuclein. *PLoS One* 2013; 8: e63557.
- 570    Shipper HM, Liberman A, Stopa EG. Neural heme oxygenase-1 expression in idiopathic  
571        Parkinson's disease. *Exp Neurol* 1998; 150: 60-8.
- 572    Schapira AH, Hartley A, Cleeter MW, Cooper JM. Free radicals and mitochondrial dysfunc-  
573        tion in Parkinson's disease. [Review]. *Biochem Soc Trans* 1993; 21: 367–70.
- 574    Shi T, Wang F, Stieren E, Tong Q. SIRT3, a mitochondrial sirtuin deacetylase, regulates mi-  
575        tochondrial function and thermogenesis in brown adipocytes. *J Biol Chem* 2005;  
576        280:13560–67.
- 577    Siddiqui A, Chinta SJ, Mallajosyula JK, Rajagopalan S, Hanson I, Rane A, et al. Selective  
578        binding of nuclear alpha-synuclein to the PGC1alpha promoter under conditions of oxida-  
579        tive stress may contribute to losses in mitochondrial function: implications for Parkinson's  
580        disease. *Free Radic Biol Med* 2012; 53: 993–1003.
- 581    Song W, Patel A, Qureshi HY, Han D, Schipper HM, Paudel HK. The Parkinson disease-  
582        associated A30P mutation stabilizes alpha-synuclein against proteasomal degradation  
583        triggered by heme oxygenase-1 over-expression in human neuroblastoma cells. *J Neuro-*  
584        *chem* 2009; 110: 719-33.
- 585    Subramaniam SR, Vergnes L, Franich NR, Reue K, Chesselet MF. Region specific mitochon-  
586        drial impairment in mice with widespread overexpression of alpha-synuclein. *Neurobiol*  
587        *Dis* 2014; 70: 204-13.
- 588    Takeuchi K, Morizane Y, Kamami-Levy C, Suzuki J, Kayama M, Cai W, et al. AMP-  
589        dependent kinase inhibits oxidative stress-induced caveolin-1 phosphorylation and endo-

590 cytoskeleton by suppressing the dissociation between c-Abl and Prdx1 proteins in endothelial  
591 cells. *J Biol Chem* 2013; 288: 20581-591.

592 Torrens-Mas M, Oliver J, Roca P, Sastre-Serra J. SIRT3: Oncogene and Tumor Suppressor in  
593 Cancer. [Review]. *Cancers (Basel)* 2017; 9: 90.

594 van der Bliek AM, Shen Q, Kawajiri S. Mechanisms of mitochondrial fission and fusion.  
595 [Review]. *Cold Spring Harb Perspect Biol* 2013; 5: a011072.

596 Weir HJ, Murray TK, Kehoe PG, Love S, Verdin EM, O'Neill MJ, et al. CNS SIRT3 expres-  
597 sion is altered by reactive oxygen species and in Alzheimer's disease. *PLoS One* 2012; 7:  
598 e48225.

599 Yin J, Han P, Tang Z, Liu Q, Shi J. Sirtuin 3 mediates neuroprotection of ketones against is-  
600 chemic stroke. *J Cereb Blood Flow Metab* 2015; 35: 1783-89.

601 Zhang JY, Deng YN, Zhang M, Su H, Qu QM. SIRT3 Acts as a Neuroprotective Agent in Ro-  
602 tenone-Induced Parkinson Cell Model. *Neurochem Res* 2016; 41: 1761-73.

603

604 **Table 1** Human brain samples.

| Case | Pathology diagnosis | Thal | Braak | Clinical diagnosis | Age | Sex    |
|------|---------------------|------|-------|--------------------|-----|--------|
| 1    | Normal              |      | 2     | EtOHism/aMCI       | 70  | Male   |
| 2    | Normal              |      | 0     | Normal             | 56  | Female |
| 3    | Normal              |      | 0     | Normal             | 57  | Female |
| 4    | Normal              | 0    | 2     | AD v DLB           | 69  | Male   |
| 5    | Normal              | 1    | 1     | DA                 | 64  | Female |
| 6    | Normal              | 0    | 3     | DLB v FTD          | 63  | Male   |
| 7    | Normal              |      | 0     | Normal             | 61  | Female |
| 8    | Normal              | 1    | 1     | NAIM               | 60  | Female |
| 9    | Normal              | 0    | 1     | PSP/PLS            | 56  | Female |
| 10   | Normal              | 0    | 1     | TD                 | 61  | Male   |
| 1    | DLBD                | 0    | 0     | DLB                | 60  | Male   |
| 2    | DLBD                | 0    | 2     | DLB                | 61  | Male   |
| 3    | DLBD                | 0    | 2     | PDD                | 66  | Male   |
| 4    | DLBD                | 0    | 0     | PDD                | 68  | Female |
| 5    | DLBD                | 1    | 2     | PSP                | 72  | Female |
| 6    | DLBD                | 1    | 2     | DLB (RBD)          | 70  | Male   |
| 7    | DLBD                | 1    | 2     | PDD                | 56  | Male   |
| 8    | DLBD                | 1    | 2.5   | PDD                | 62  | Female |
| 9    | DLBD                | 0    | 2     | PD-MCI             | 66  | Male   |
| 10   | DLBD                | 2    | 1     | PDD v CBD          | 69  | Female |

605

606 AD = Alzheimer's diseases; aMCI = amnesic mild cognitive impairment; CBD = corticobasal degen-  
 607 eration; DA = dysautonomia; DLBD = diffuse lewy body disease; DLB = dementia with lewy bodies;  
 608 FTD = frontotemporal dementia; NAIM = nonvasculitic autoimmune inflammatory meningoencepha-  
 609 litis; PD = Parkinson's disease; PDD = Parkinson's disease with dementia; PLS = primary lateral scler-  
 610 osis; PSP = progressive supranuclear palsy; RBD = REM sleep behavior disorder; TD = Torsion dys-  
 611 tonia.

612

613

614 **Table 2** Antibodies used for western blot and immunocytochemistry.

| Antibody                           | Source                                | Dilution         |
|------------------------------------|---------------------------------------|------------------|
| $\alpha$ -Synuclein (mouse)        | BD Transduction Laboratories (61078)  | 1:2000 (WB)      |
|                                    | Biologend (SIG39730)                  | 1:2000 (WB, ICC) |
| OPA1 (mouse)                       | BD Transduction Laboratories (612606) | 1:2000 (WB)      |
| SIRT3 (mouse)                      | Santa Cruz (sc-135796)                | 1:1000 (WB)      |
| SIRT3 (rabbit)                     | Novus Biologicals (NBP1-31029)        | 1:1000 (WB)      |
|                                    |                                       | 1:500 (ICC)      |
| Heme oxygenase-1 (rabbit)          | Cell Signaling (5853s)                | 1:1000 (WB)      |
| AMPK (rabbit)                      | Cell Signaling (5831T)                | 1:1000 (WB)      |
| Phospho-AMPK (rabbit)              | Cell Signaling (2535s)                | 1:1000 (WB)      |
| CREB (rabbit)                      | Cell Signaling (4820s)                | 1:1000 (WB)      |
| Phospho-CREB (rabbit)              | EMD Millipore (06-519)                | 1:2000 (WB)      |
| DRP1 (rabbit)                      | Bethyl Laboratories (A303-410A-M)     | 1:2000 (WB)      |
| Phospho-DRP1 (rabbit)              | Cell Signaling (3455s)                | 1:1000 (WB)      |
| SOD2                               | abcam (ab13533)                       | 1:5000 (WB)      |
| SOD2 (acetyl K68) (rabbit)         | abcam (ab137037)                      | 1:2000 (WB)      |
| COX IV (rabbit)                    | Cell Signaling (4850s)                | 1:1000 (WB)      |
| GAPDH (rabbit)                     | Santa Cruz (sc-25778)                 | 1:4000 (WB)      |
|                                    | Abgent (AP7873a)                      | 1:4000 (WB)      |
| Alexa Fluor 488 (goat anti-mouse)  | Thermo Fisher Scientific (A11001)     | 1:500 (ICC)      |
| Alexa Fluor 568 (goat anti-rabbit) | Thermo Fisher Scientific (A11011)     | 1:500 (ICC)      |
| Goat anti-mouse HRP                | Southern biotech (1010-05)            | 1:5000 (WB)      |
| Goat anti-rabbit HRP               | Southern biotech (4010-05)            | 1:5000 (WB)      |

615

616 WB = western blot; ICC = immunocytochemistry.

617

618 **Figure Legends**

619 **Figure 1:  $\alpha$ Syn oligomers localize to mitochondria in H4 SL1&SL2 cells and induce a**  
620 **decrease in SIRT3 expression.** (A) Representative cropped western blots showing  $\alpha$ syn and  
621 SIRT3 in cytosolic and mitochondrial fractions at different time points (0 – 72h) (B) Quanti-  
622 fication of SIRT3 protein levels in mitochondria demonstrates significant decrease in SIRT3  
623 after 24h. Increased  $\alpha$ syn oligomers at 24h and up to 72h are detected by luminescence assay  
624 (RLU: relative luciferase units), n=5. (C) H4 SL1&SL2 cells transfected with SIRT3 siRNA  
625 have less SIRT3 expression after 72h in whole cells lysates n=2 (D) Level of  $\alpha$ syn oligomers  
626 is significantly increased in cells transfected with SIRT3 siRNA. Error bars represent the  
627 mean  $\pm$  S.E.M. \*P < 0.05, \*\*P < 0.01 compared to control conditions; #P < 0.05, ###P < 0.01  
628 compared to SIRT3 siRNA transfection. n.s: not significant. In panel (A)  $\alpha$ syn and SIRT3  
629 bands are obtained from different samples run on different gels. COXIV, GAPDH, and SIRT3  
630 are all from same samples and blot. Loading controls for  $\alpha$ syn blot are not shown. In panel  
631 (C)  $\alpha$ syn, SIRT3, and GAPDH are probed on same blot.

632 **Figure 2: AICAR activates AMPK-CREB signaling pathway and increases SIRT3 activ-**  
633 **ity to reduce  $\alpha$ syn oligomers.** (A) Representative cropped western blots from showing  
634 AMPK $\alpha$ , p-AMPK $\alpha$  (Thr 172), CREB, and p-CREB (Ser 133) in H4 SL1&SL2 cells  
635 with/without 2mM AICAR. Quantification of blots show decreased of p-AMPK $\alpha$  (n=4) and  
636 p-CREB (n=3) at 72h, restored by AICAR treatment. (B) Levels of SIRT3 are restored after  
637 AICAR-treatment, n=3. (C) Luciferase assay shows activation of SIRT3 by AICAR signifi-  
638 cantly decreases  $\alpha$ syn oligomers (n=5). (D) Representative cropped western blot showing in-  
639 creased Ac-SOD2 (acetyl K68) with no change in total SOD2 in whole cells lysates. AICAR  
640 reversed the change in acetylated SOD2 level, n=3. Error bars represent the mean  $\pm$  S.E.M (n  
641 = 3-5). \*P < 0.05, \*\*P < 0.01 compared to control conditions; #P < 0.05, ###P < 0.01 com-  
642 pared to AICAR treatment. n.s: not significant. In panel (A) the same samples were run on  
643 different gels and probed separately for AMPK $\alpha$ , p-AMPK $\alpha$ , and GAPDH, and CREB, p-  
644 CREB, and GAPDH respectively. In panels (B) and (D) separate blots were probed for  
645 SIRT3 and GAPDH, SIRT3 and COXIV, or SOD2, Ac-SOD2, and GAPDH.

646 **Figure 3: Activation of SIRT3 by AICAR attenuates ROS production.** (A) Fluorescence  
647 microscopy images of MitoSox and Mitotracker staining in fixed H4 SL1&SL2 cells.  $\alpha$ Syn  
648 oligomer expression increases mtROS at 72h, and AICAR treatment attenuates mtROS. Rep-  
649 resentative image from 3 experiments. MitoTracker-Green (mitochondria; green); MitoSox-  
650 Red (mitochondria; red); merged images (yellow). Scale bar = 10 $\mu$ m. White arrow indicates

651 mtROS. (B) Representative cropped western blot of HO-1 and GAPDH in whole cells lysates  
652 from H4 SL1&SL2 cells. HO-1 level increases at 72h and is reduced after AICAR-treatment,  
653 n=5. Error bars represent the mean  $\pm$  S.E.M. \*P < 0.05 compared to control conditions; #P <  
654 0.05 compared to AICAR treatment. n.s: not significant.

655 **Figure 4: SIRT3 activation restores DRP1 and OPA1 expression and rescues impaired**  
656 **mitochondrial dynamics.** (A) Representative cropped western blot showing DRP1 and  
657 OPA1 in cytosol and mitochondria from H4 SL1&SL2 cells over time (0 – 72h). (B) Quanti-  
658 tation of protein levels for DRP1 and OPA1 in cytosol and mitochondria from n=3 (DRP1)  
659 and n=4 (OPA1) blots. DRP1 and OPA1 bands were normalized to respective loading con-  
660 trols GAPDH and COXIV. (C and D) Representative cropped western blot from showing  
661 OPA1 (n= 3) and p-DRP1 (n=4) levels in cells treated with or without AICAR. AICAR-  
662 treatment restores the OPA1 levels in mitochondria and decreases p-DRP1 protein levels at  
663 72h. Error bars represent the mean  $\pm$  S.E.M. \*P < 0.05, \*\*P < 0.01 compared to control con-  
664 ditions; #P < 0.05, ##P < 0.01 compared to AICAR treatment. n.s: not significant.

665 **Figure 5: Activation of SIRT3 by AICAR rescues mitochondrial dysfunction induced by**  
666  **$\alpha$ syn oligomers.** (A) Mitochondrial OCR was assessed by Seahorse XFe96 Analyzer. The  
667 OCR is significantly reduced in cells overexpressing  $\alpha$ syn and SIRT3 activation significantly  
668 improves the OCR levels and respiratory function (n=4). (B) Basal respiration. (C) ATP pro-  
669 duction (D) maximal respiration (E) spare respiratory capacity. Error bars represent the mean  
670  $\pm$  S.E.M. \*P < 0.05, \*\*P < 0.01 compared to control conditions; #P < 0.05 compared to  
671 AICAR treatment. n.s: not significant.

672 **Figure 6:  $\alpha$ Syn induces SIRT3 inactivation and modifies normal mitochondrial dynam-**  
673 **ics *in vivo*.** (A) Representative cropped western blots showing  $\alpha$ syn, SIRT3, DRP1, and  
674 OPA1 in cytosol and mitochondria from STR and SN of two rats injected with AAV8-SL1  
675 and AAV8-SL2 after 4 weeks.  $\alpha$ Syn expression increases DRP1 and decreases SIRT3 and  
676 OPA1 levels in injected side (IS) compared to non-injected side (NS). (B) Quantification of  
677  $\alpha$ syn, SIRT3, DRP1, and OPA1 protein levels in cytosol and mitochondria from two separate  
678 blots for each of 4-5 rats. All bands were normalized to respective loading controls GAPDH  
679 and COXIV. In panel (A) the same samples were run on one blot that was cropped prior to  
680 immunoblotting for  $\alpha$ syn, SIRT3, COXIV, DRP1, OPA1, and GAPDH. Error bars represent  
681 the mean  $\pm$  S.E.M (n = 4-5 rats). \*P < 0.05, \*\*P < 0.01 compared to control conditions. n.s:  
682 not significant.

683 **Figure 7: SIRT3 is decreased in human post-mortem brain of neuropathologically con-**



684 **firmed Lewy body disease individuals.** (A) Representative cropped western blot from n=3  
685 showing decreased SIRT3, and OPA1 in human post mortem brain of five Lewy body disease  
686 (LBD) brains compared to five controls. No significant difference in DRP1 protein levels was  
687 detected. (B) Quantification of SIRT3, DRP1, and OPA1 protein levels from n=3 western  
688 blots of whole brain lysates from ten LBD and ten control brains normalized to GAPDH  
689 loading control. Error bars represent the mean  $\pm$  S.E.M. **\*\*P < 0.01** compared to control  
690 conditions. n.s: not significant.

691 **Figure 8:** A schematic illustration of potential mechanisms  $\alpha$ syn-induced SIRT3 inactivation  
692 and mitochondrial dysfunction. A speculative mechanism whereby mitochondrial  $\alpha$ syn oli-  
693 gomers reduce mitochondrial SIRT3 levels is impaired translocation of SIRT3 from cytosol  
694 due to  $\alpha$ syn/TOM20 interaction (Di Maio *et al*, 2016). Consequences of decreased SIRT3 in-  
695 clude decreased AMPK-CREB signaling, impairment in mitochondrial bioenergetics and dy-  
696 namics, and increased acetylation of SIRT3 substrates such as SOD2 all of which contribute  
697 to increased ROS production and neurodegeneration. Question mark indicates pathway not  
698 supported by data in this manuscript.

**Fig.1**

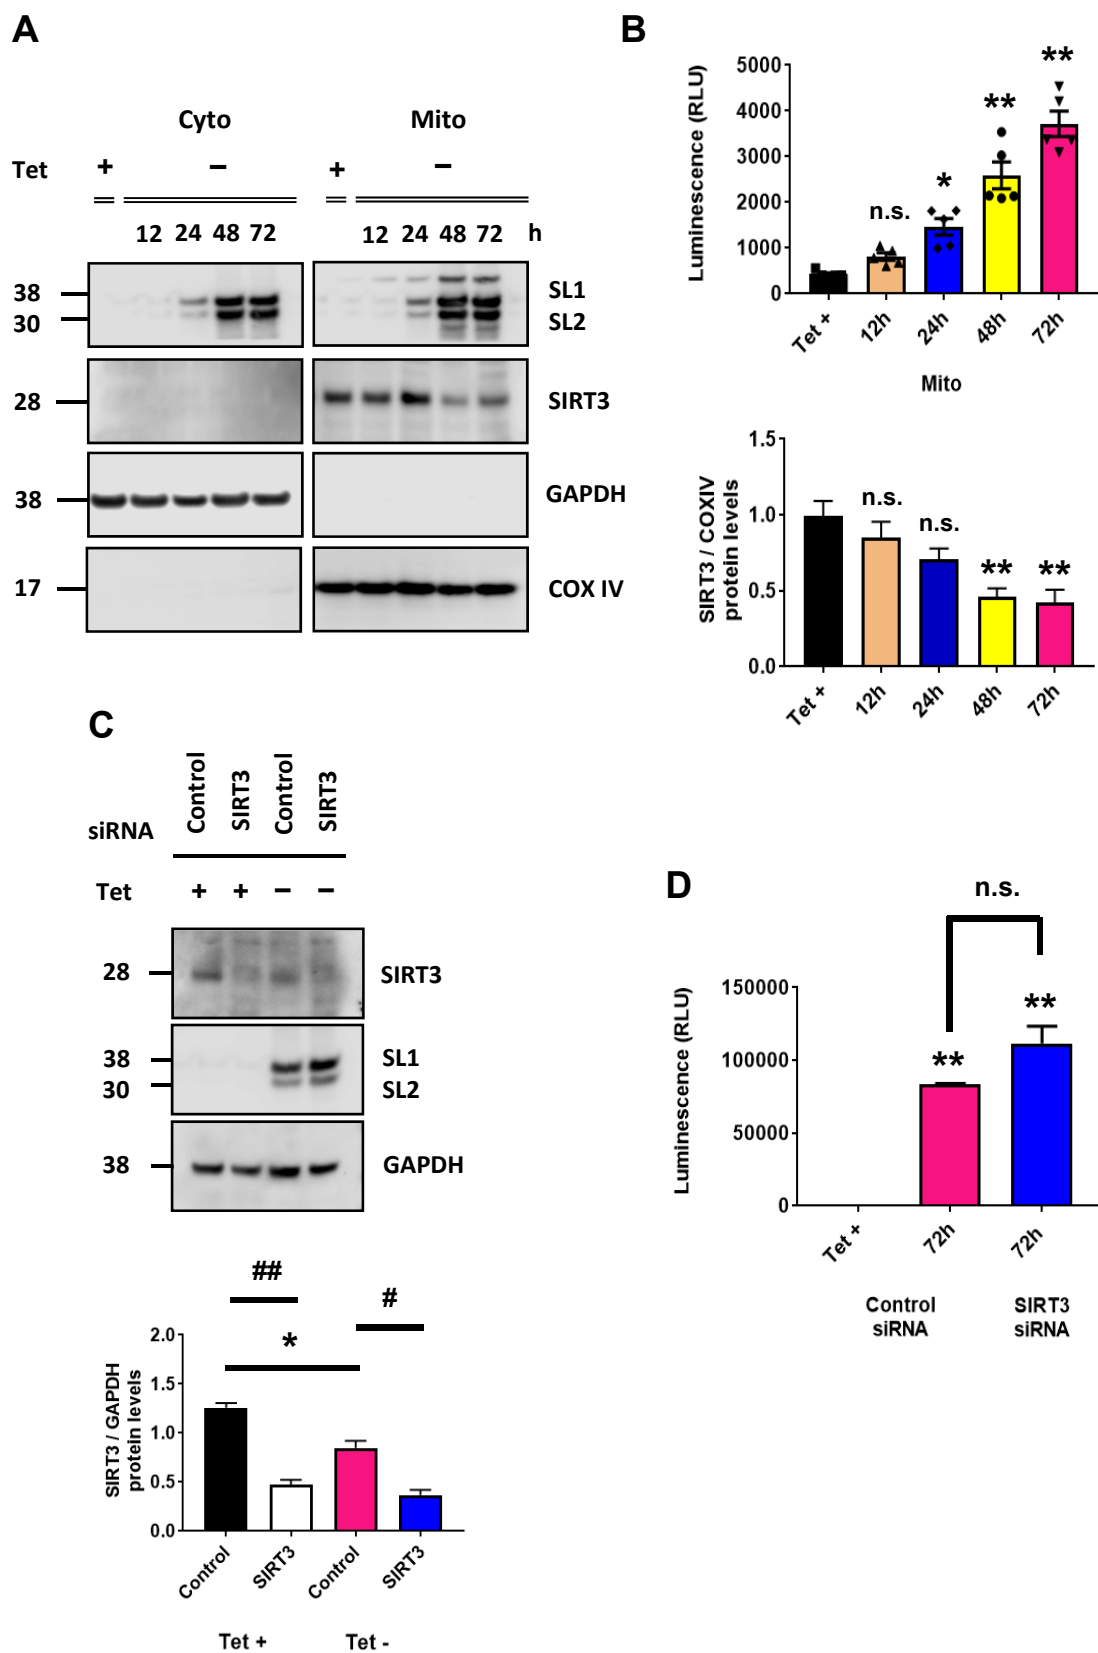

**Fig.2**

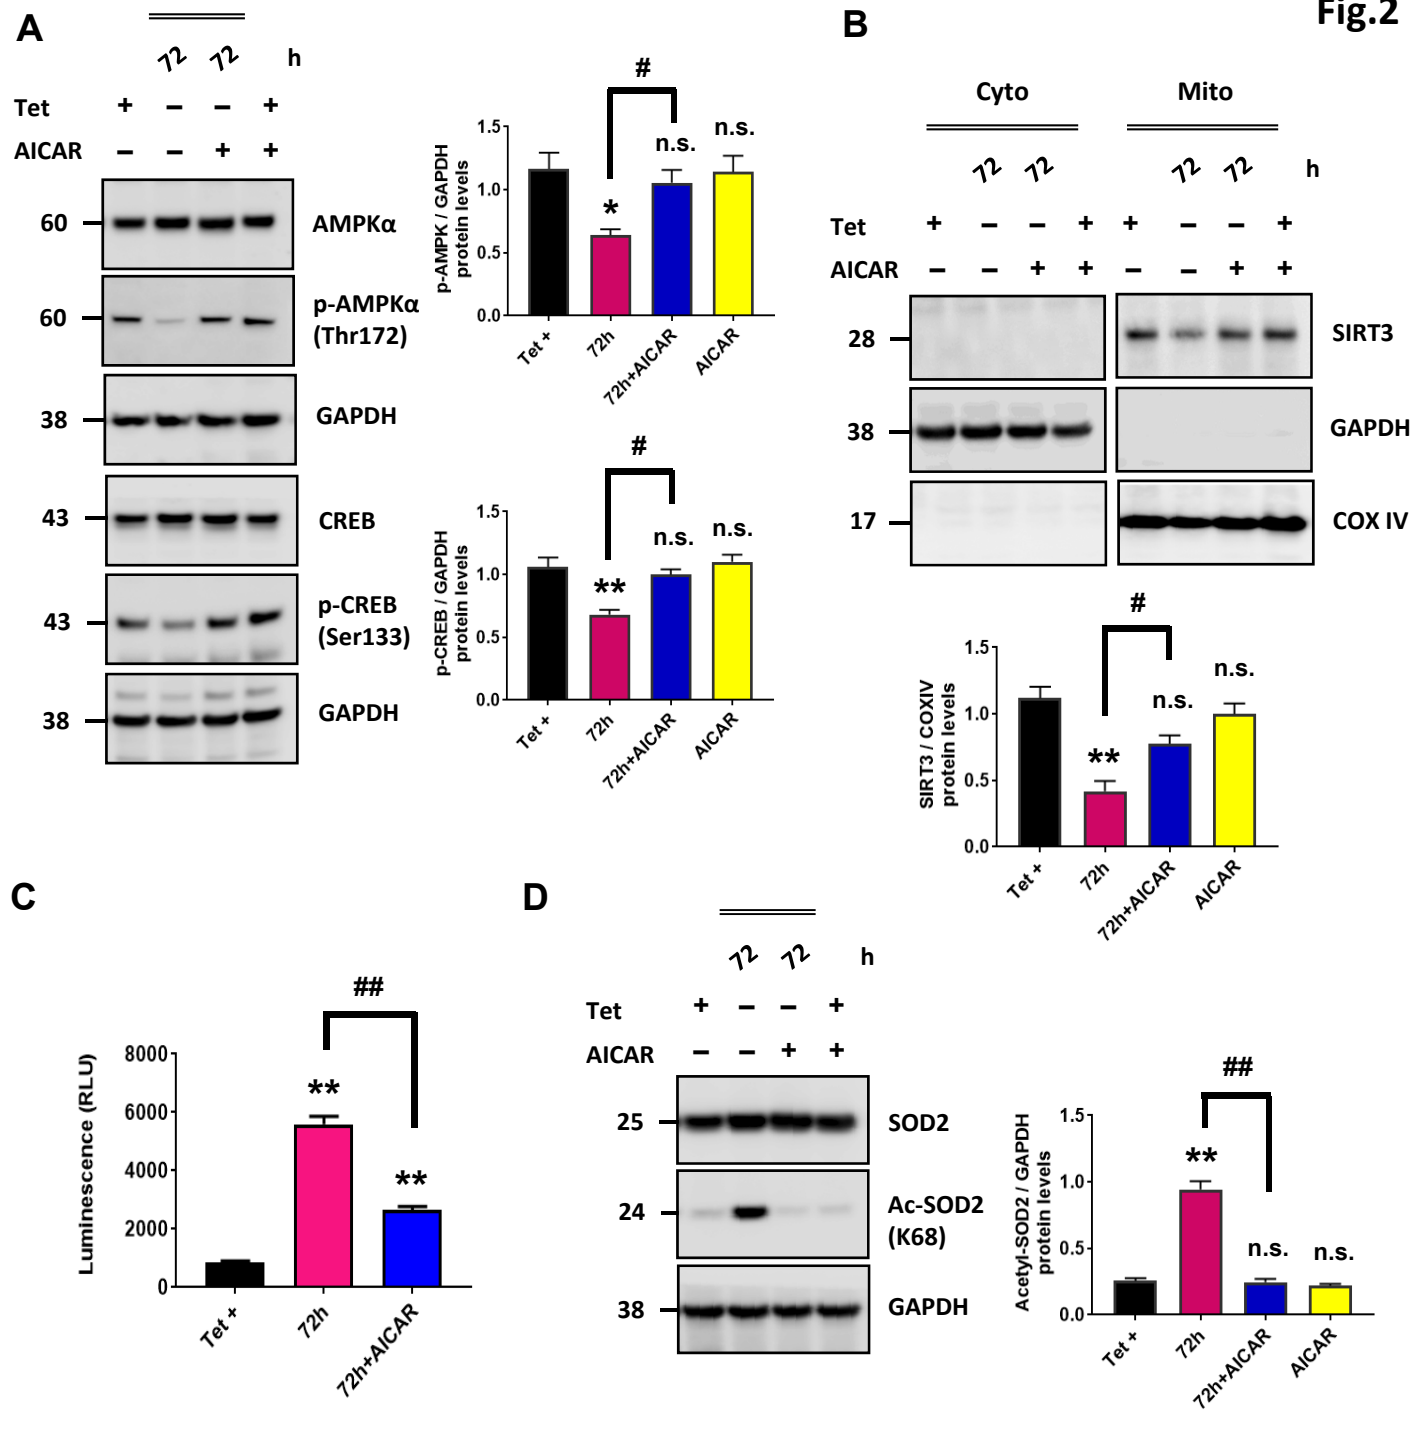

**Fig.3**

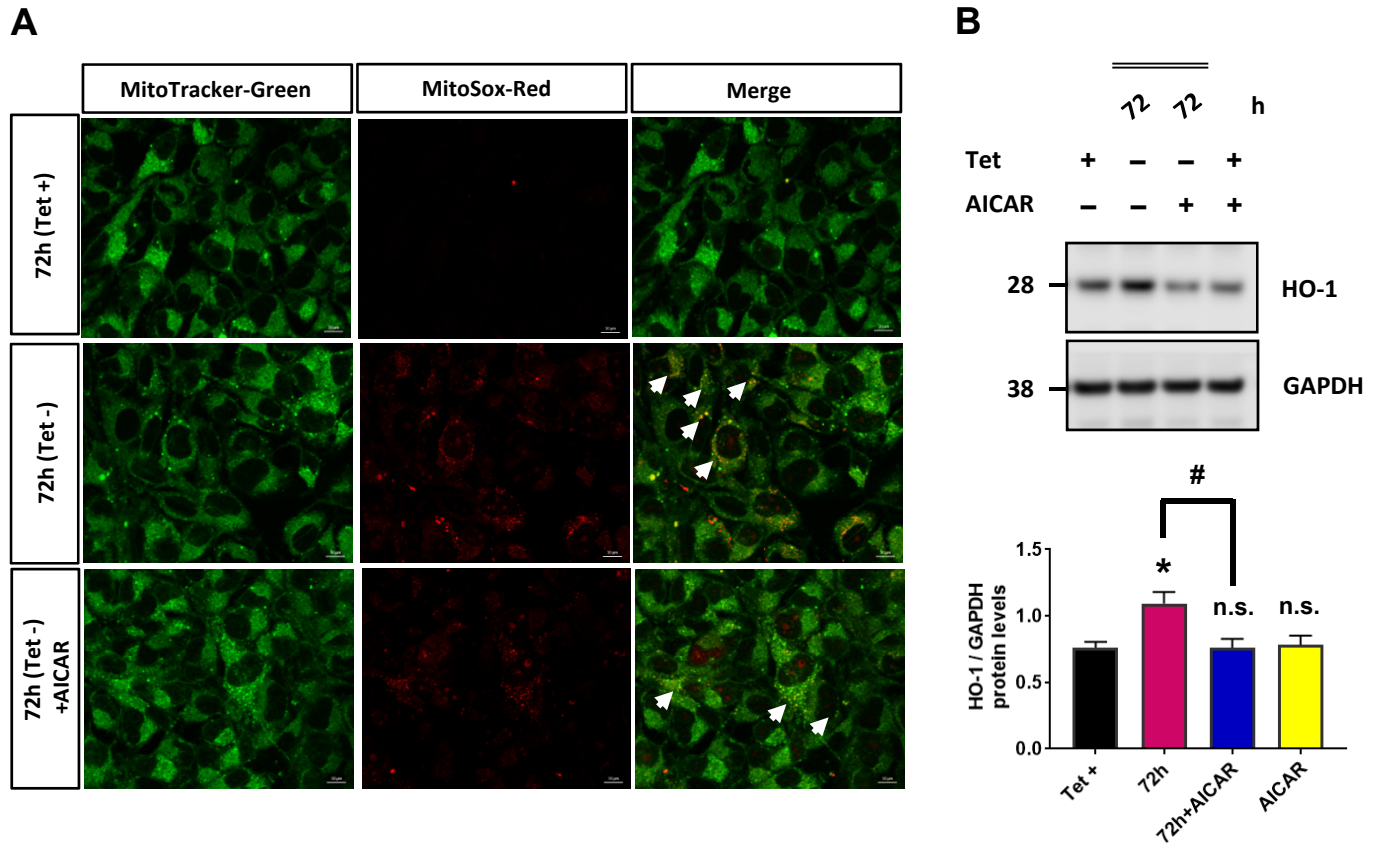

**Fig.4**

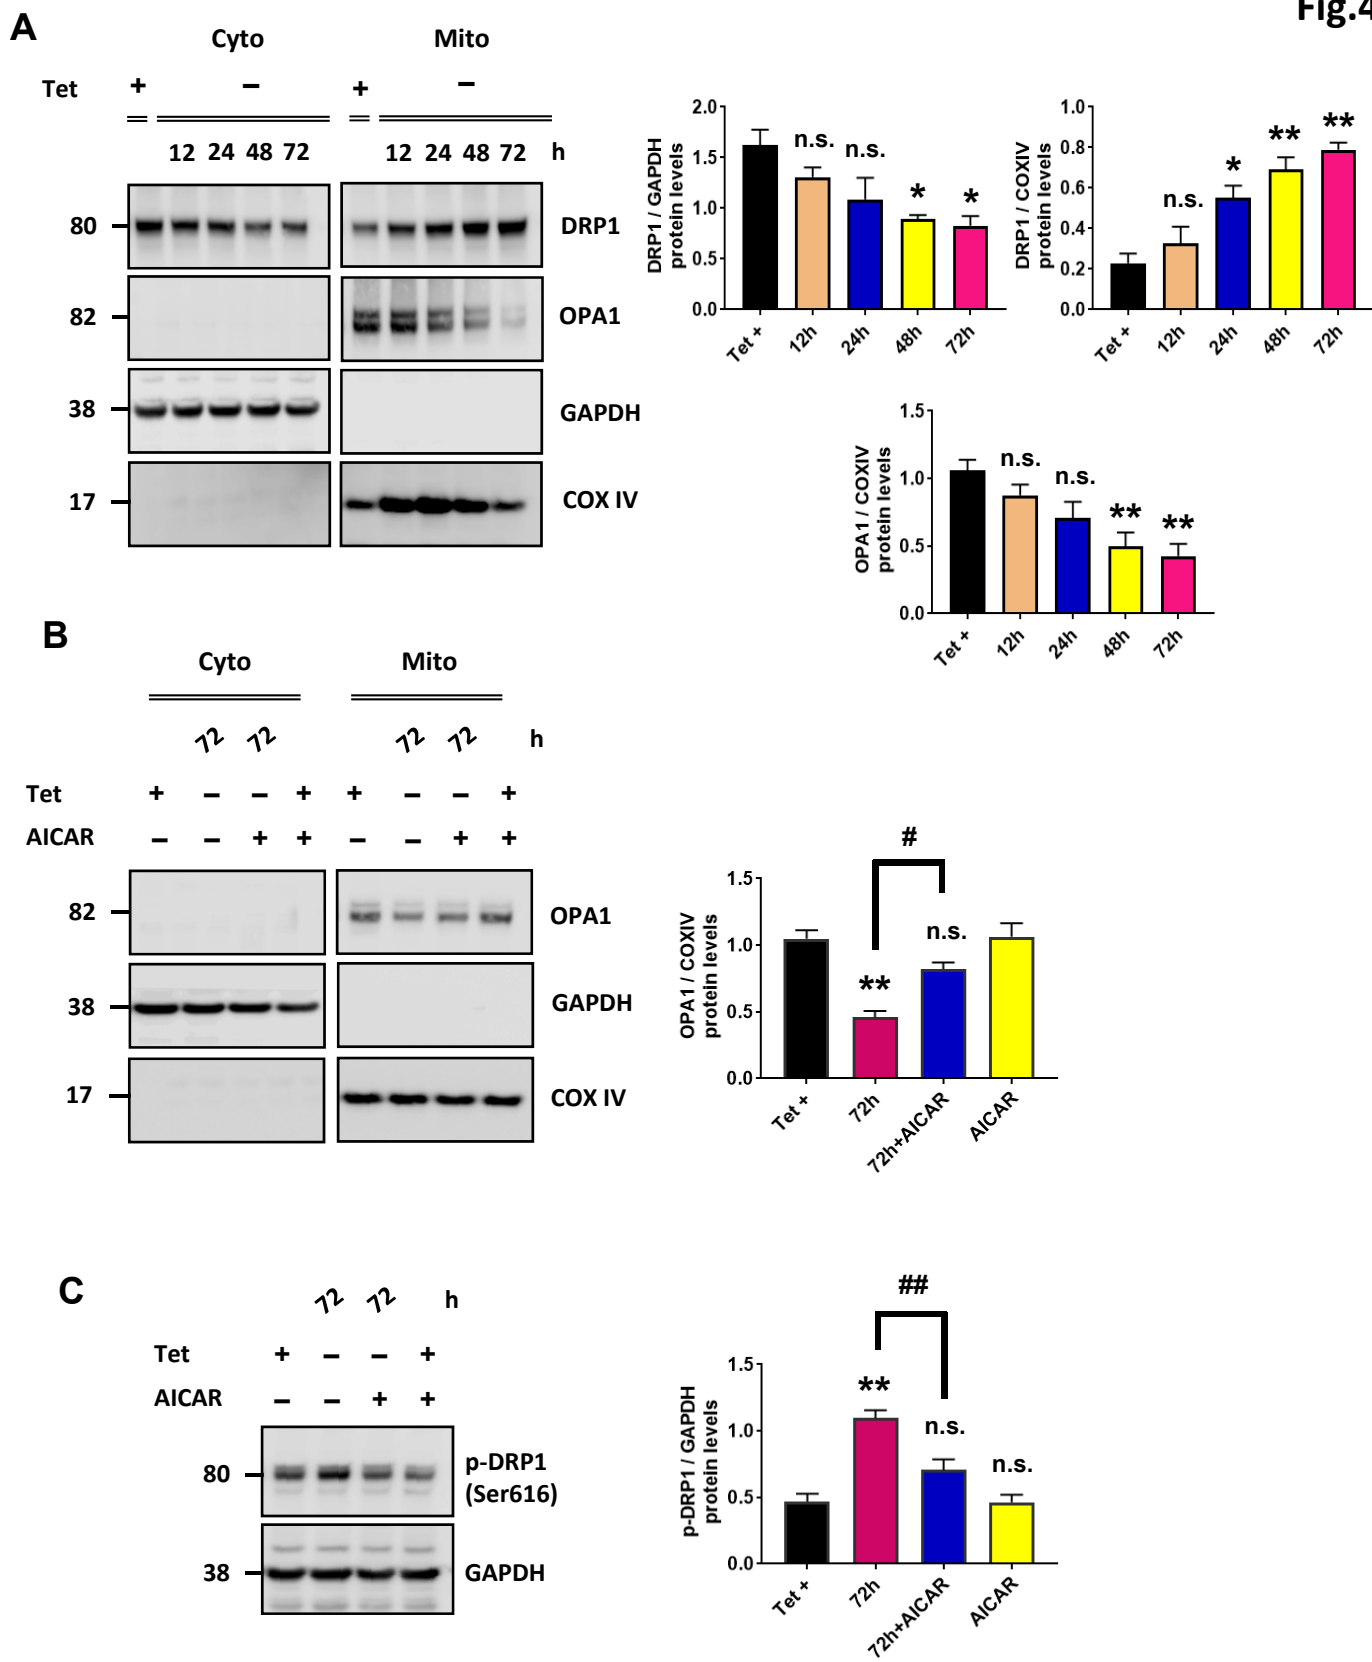

Fig.5

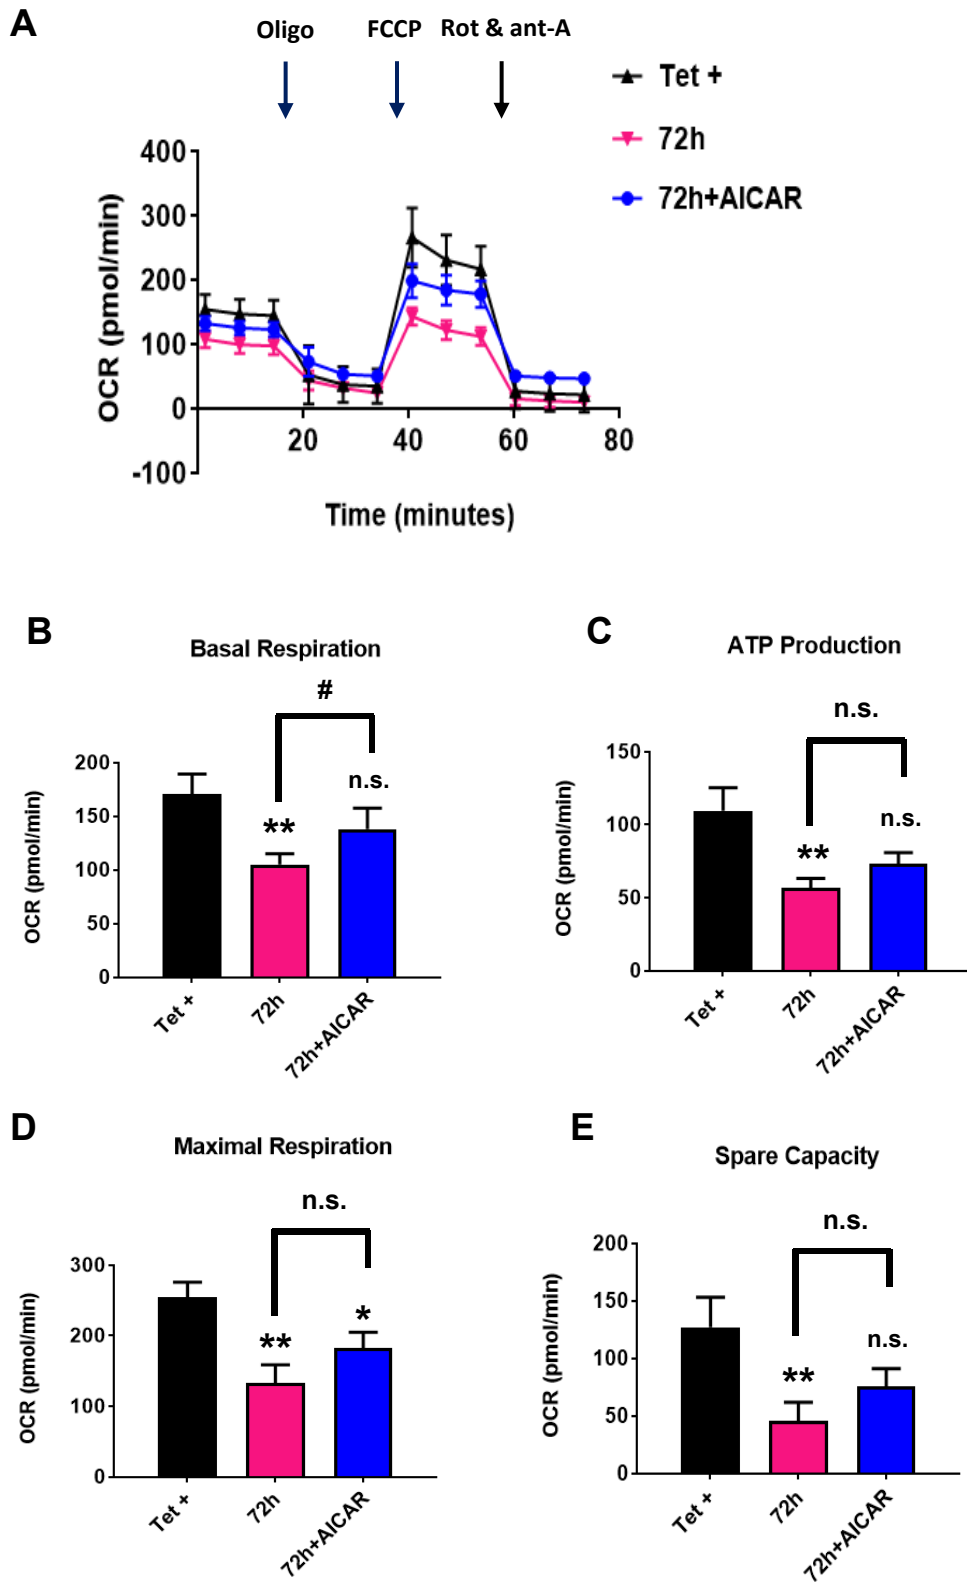

**Fig.6**

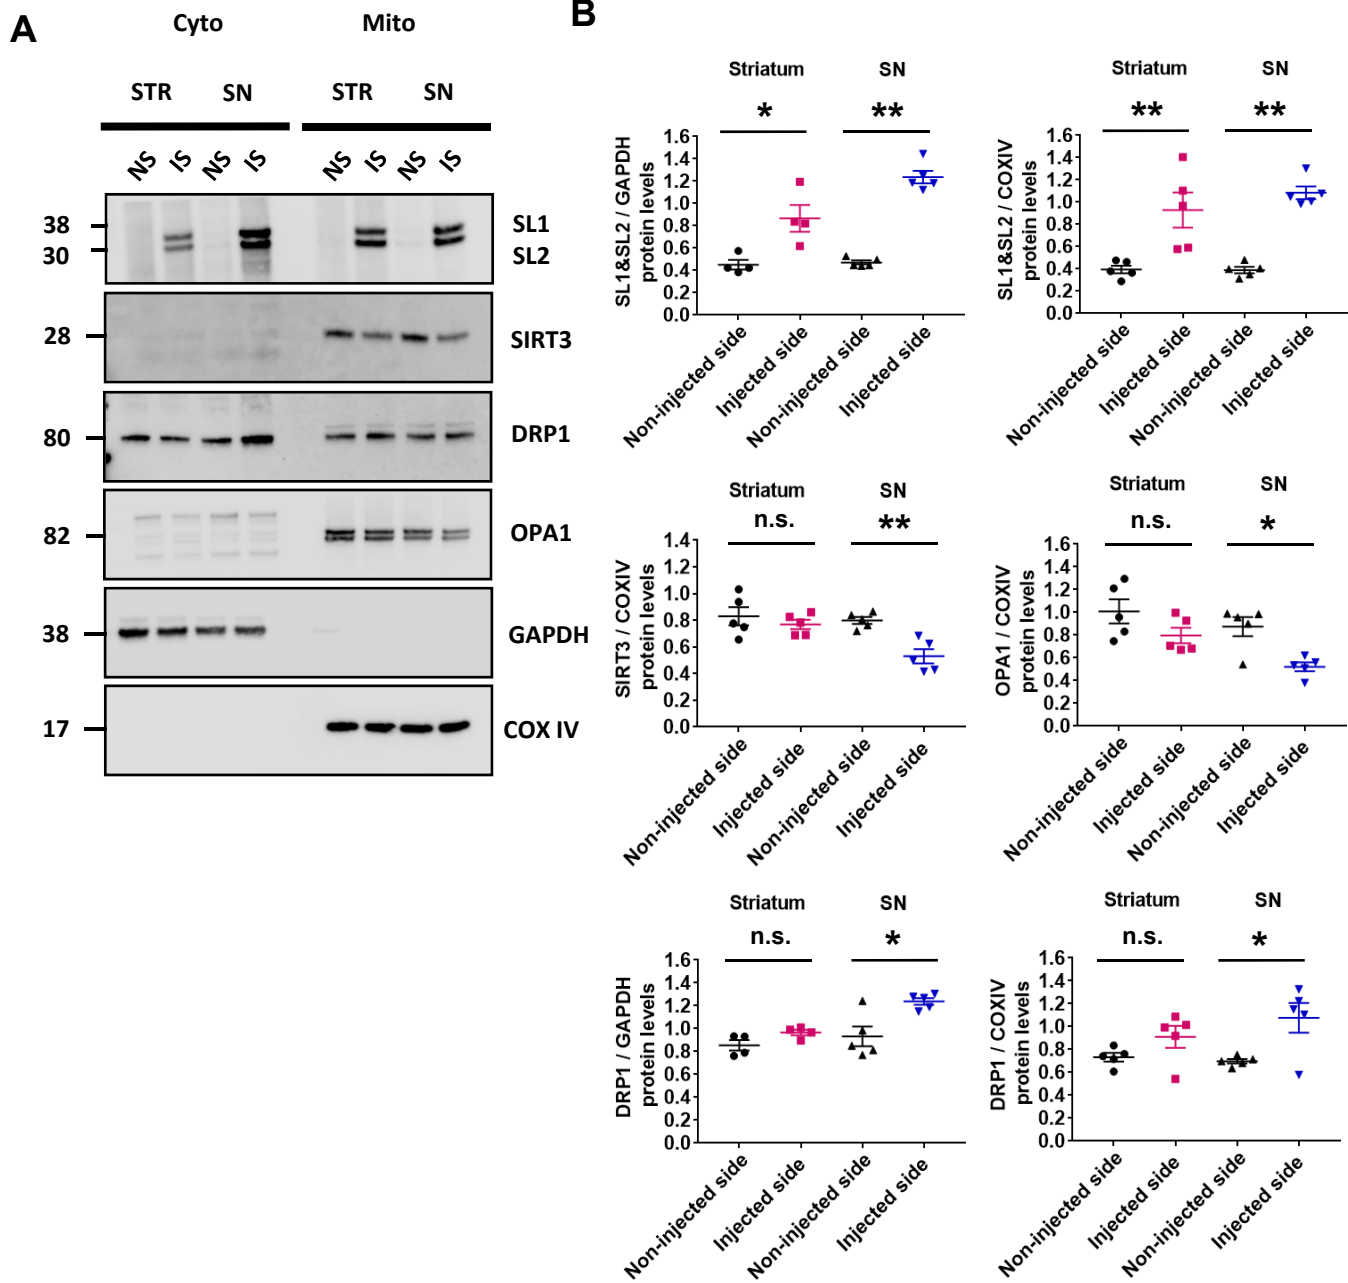

**Fig.7**

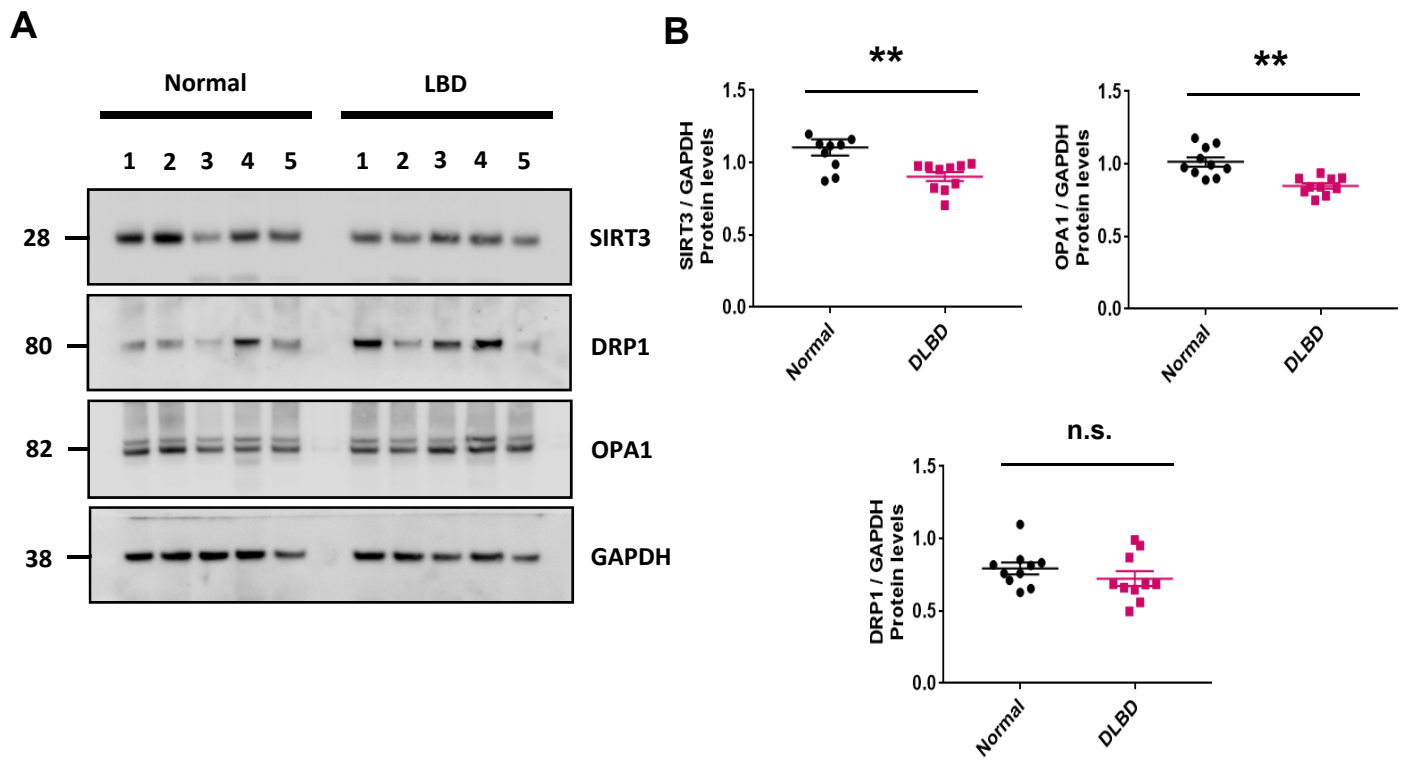



Fig.8

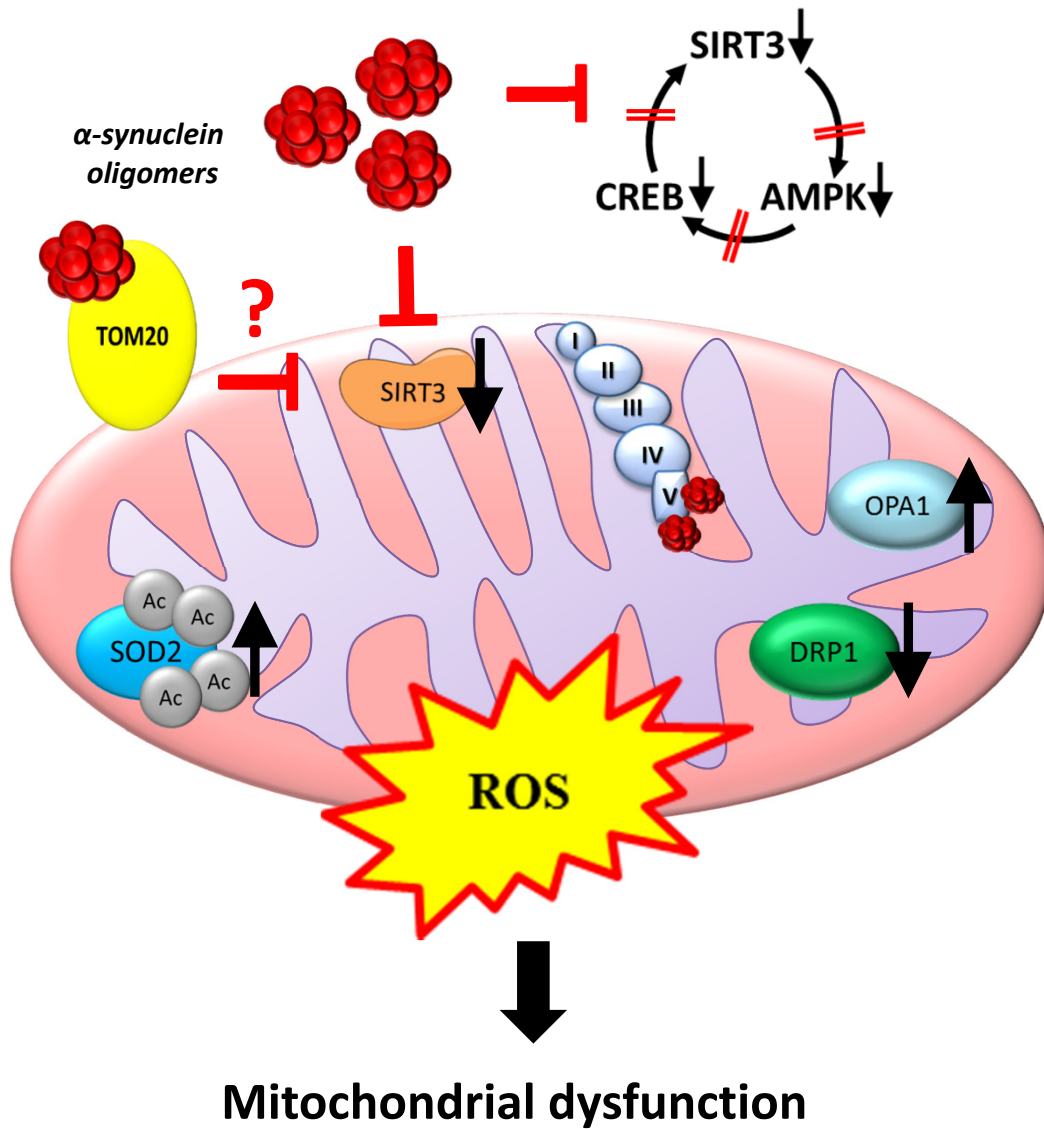

Source: https://www.biorxiv.org/content/10.1101/357624v1.full.pdf
